# Supplementary material for: Time Trends and Income Inequalities in Cancer Incidence and Cancer-Free Life Expectancy – a Cancer Site-Specific Analysis of German Health Insurance Data
Source: PubMed Central journal article supplement (PMC9046985; doi:10.3389/fonc.2022.827028), 2022-04-14

## **Supplemental Material**

### **Time trends and income inequalities in cancer incidence and cancer-free life expectancy – a cancer site-specific analysis of German health insurance data**

Fabian Tetzlaff<sup>1\*</sup>, Jens Hoebel<sup>2</sup>, Jelena Epping<sup>1,3</sup>, Siegfried Geyer<sup>1,3</sup>, Heiko Golpon<sup>3,4</sup>, Juliane Tetzlaff<sup>1</sup>

<sup>1</sup> Medical Sociology Unit, Hannover Medical School, Hanover, Germany

<sup>2</sup> Division of Social Determinants of Health, Robert Koch Institute, Berlin, Germany

<sup>3</sup> Comprehensive Cancer Center Hannover, Hannover Medical School, Hanover, Germany

<sup>4</sup> Department of Pneumology, Hannover Medical School, Hanover, Germany

\*Corresponding author

E-mail: [TetzlaffF@rki.de](mailto:TetzlaffF@rki.de)

**Fig. S1 Time trend in age-specific total cancer incidence per 100,000 person-years by sex and income group**

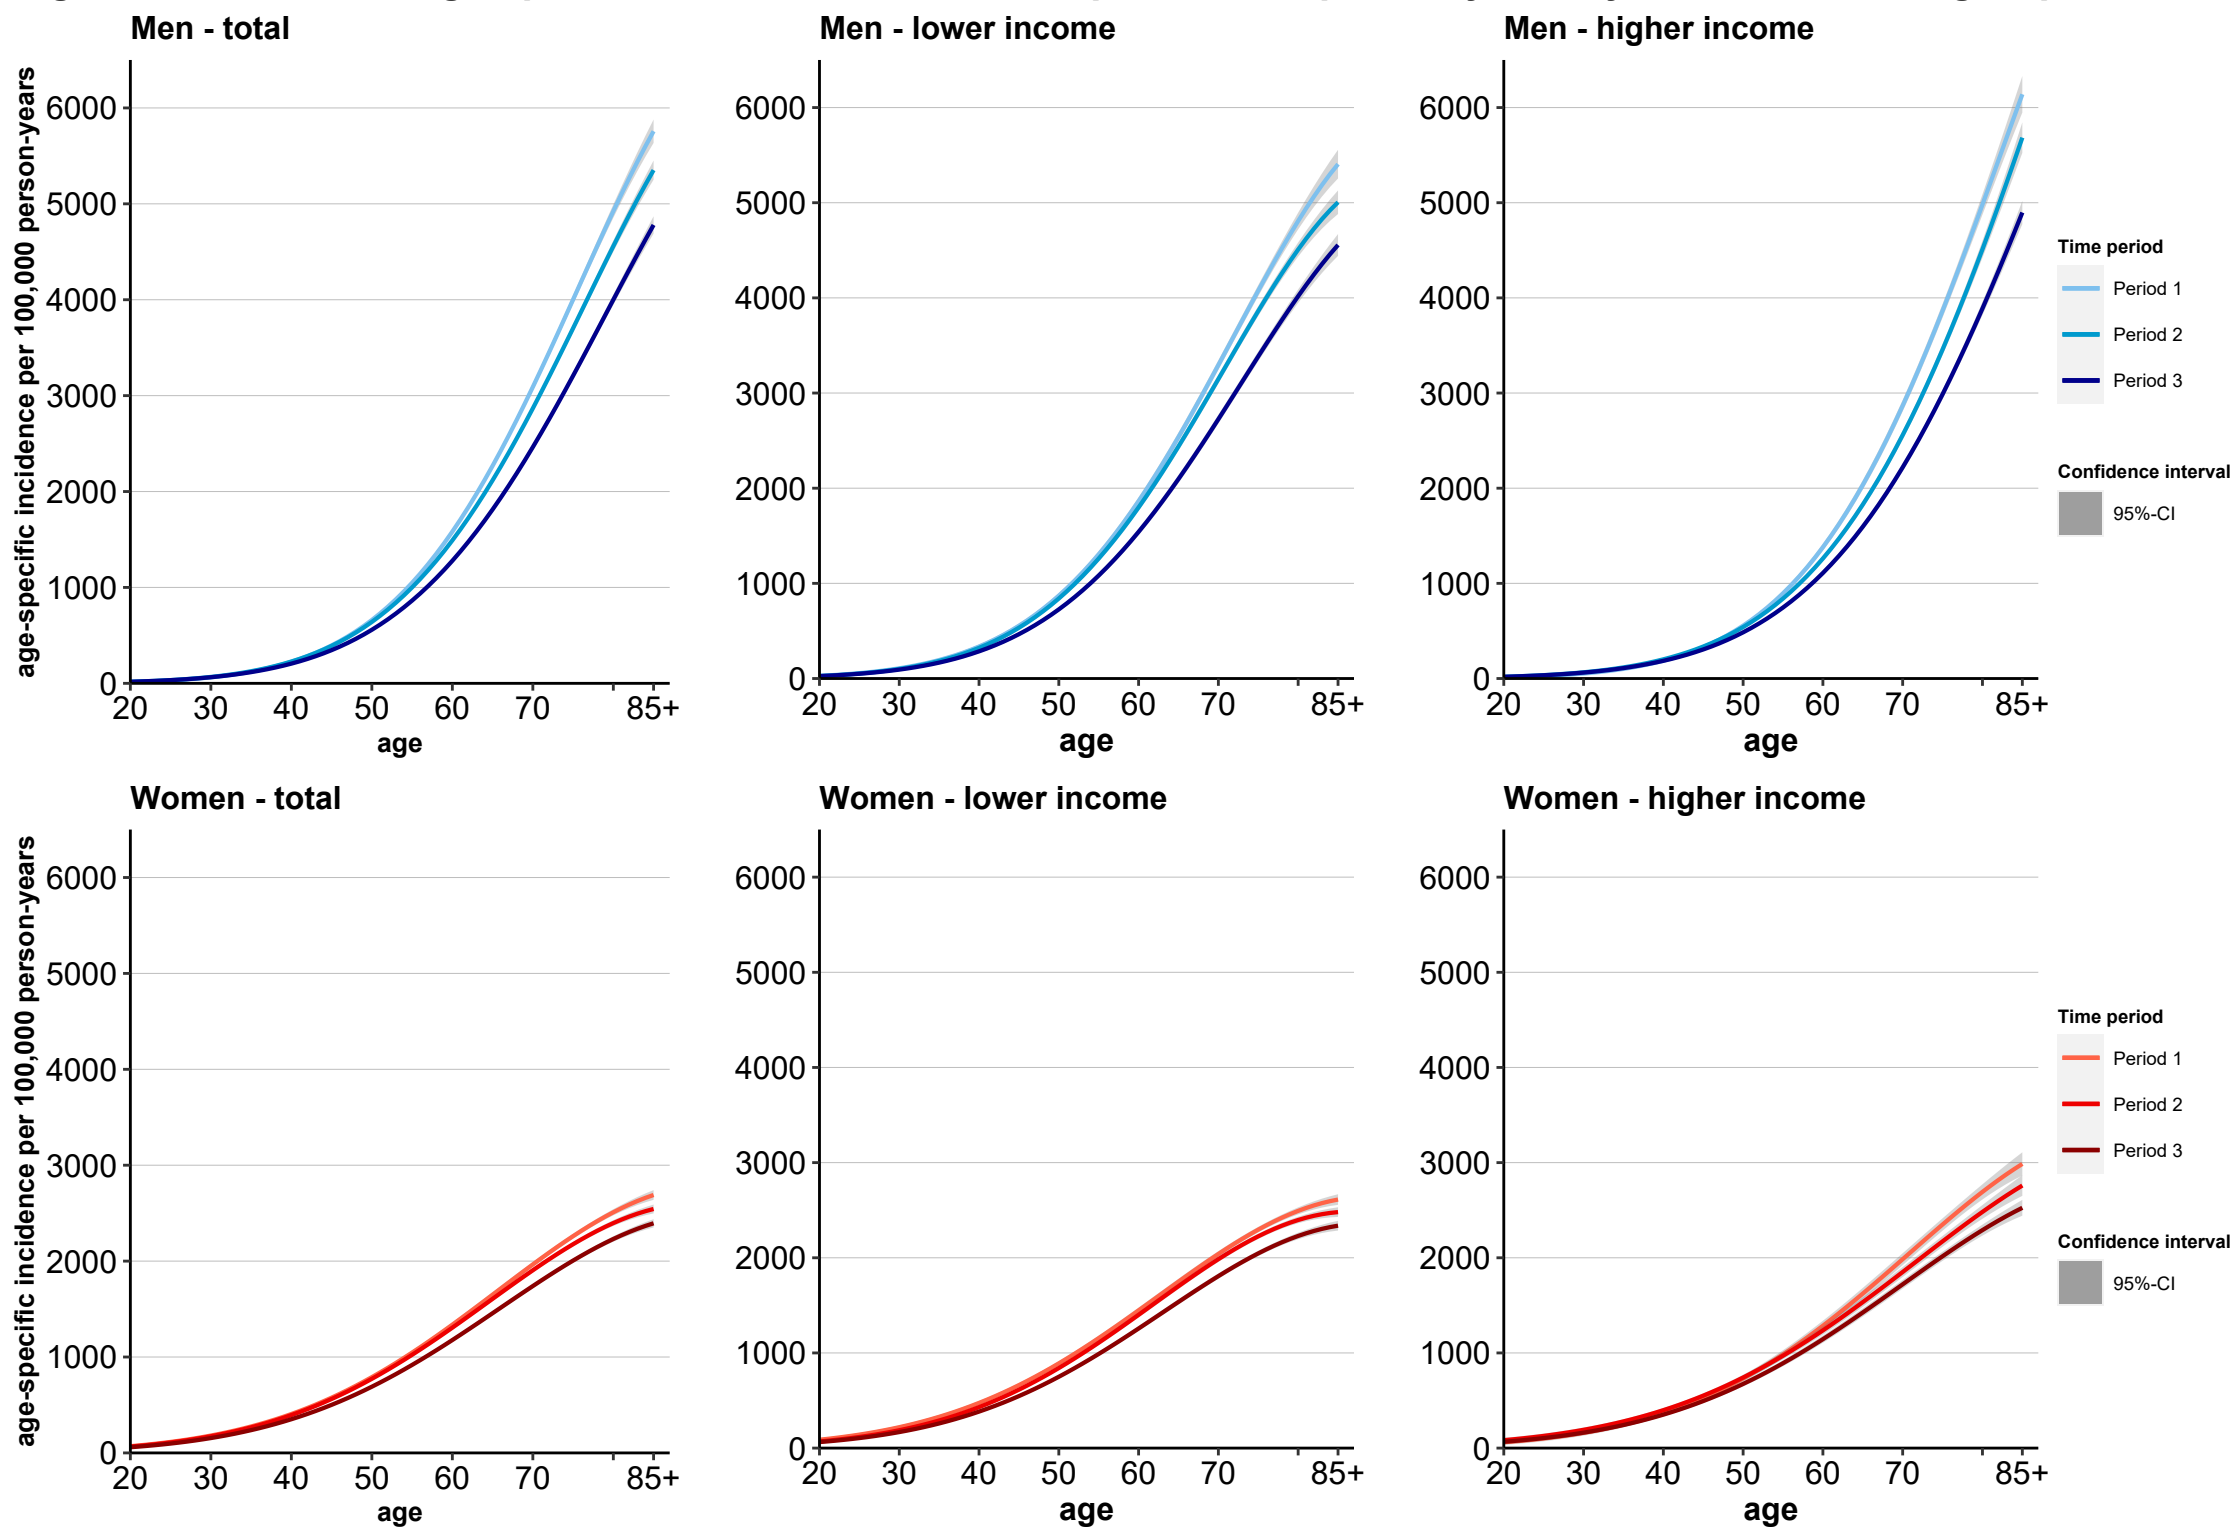

**Fig. S2 Time trend in age-specific colon cancer incidence per 100,000 person-years by sex and income group**

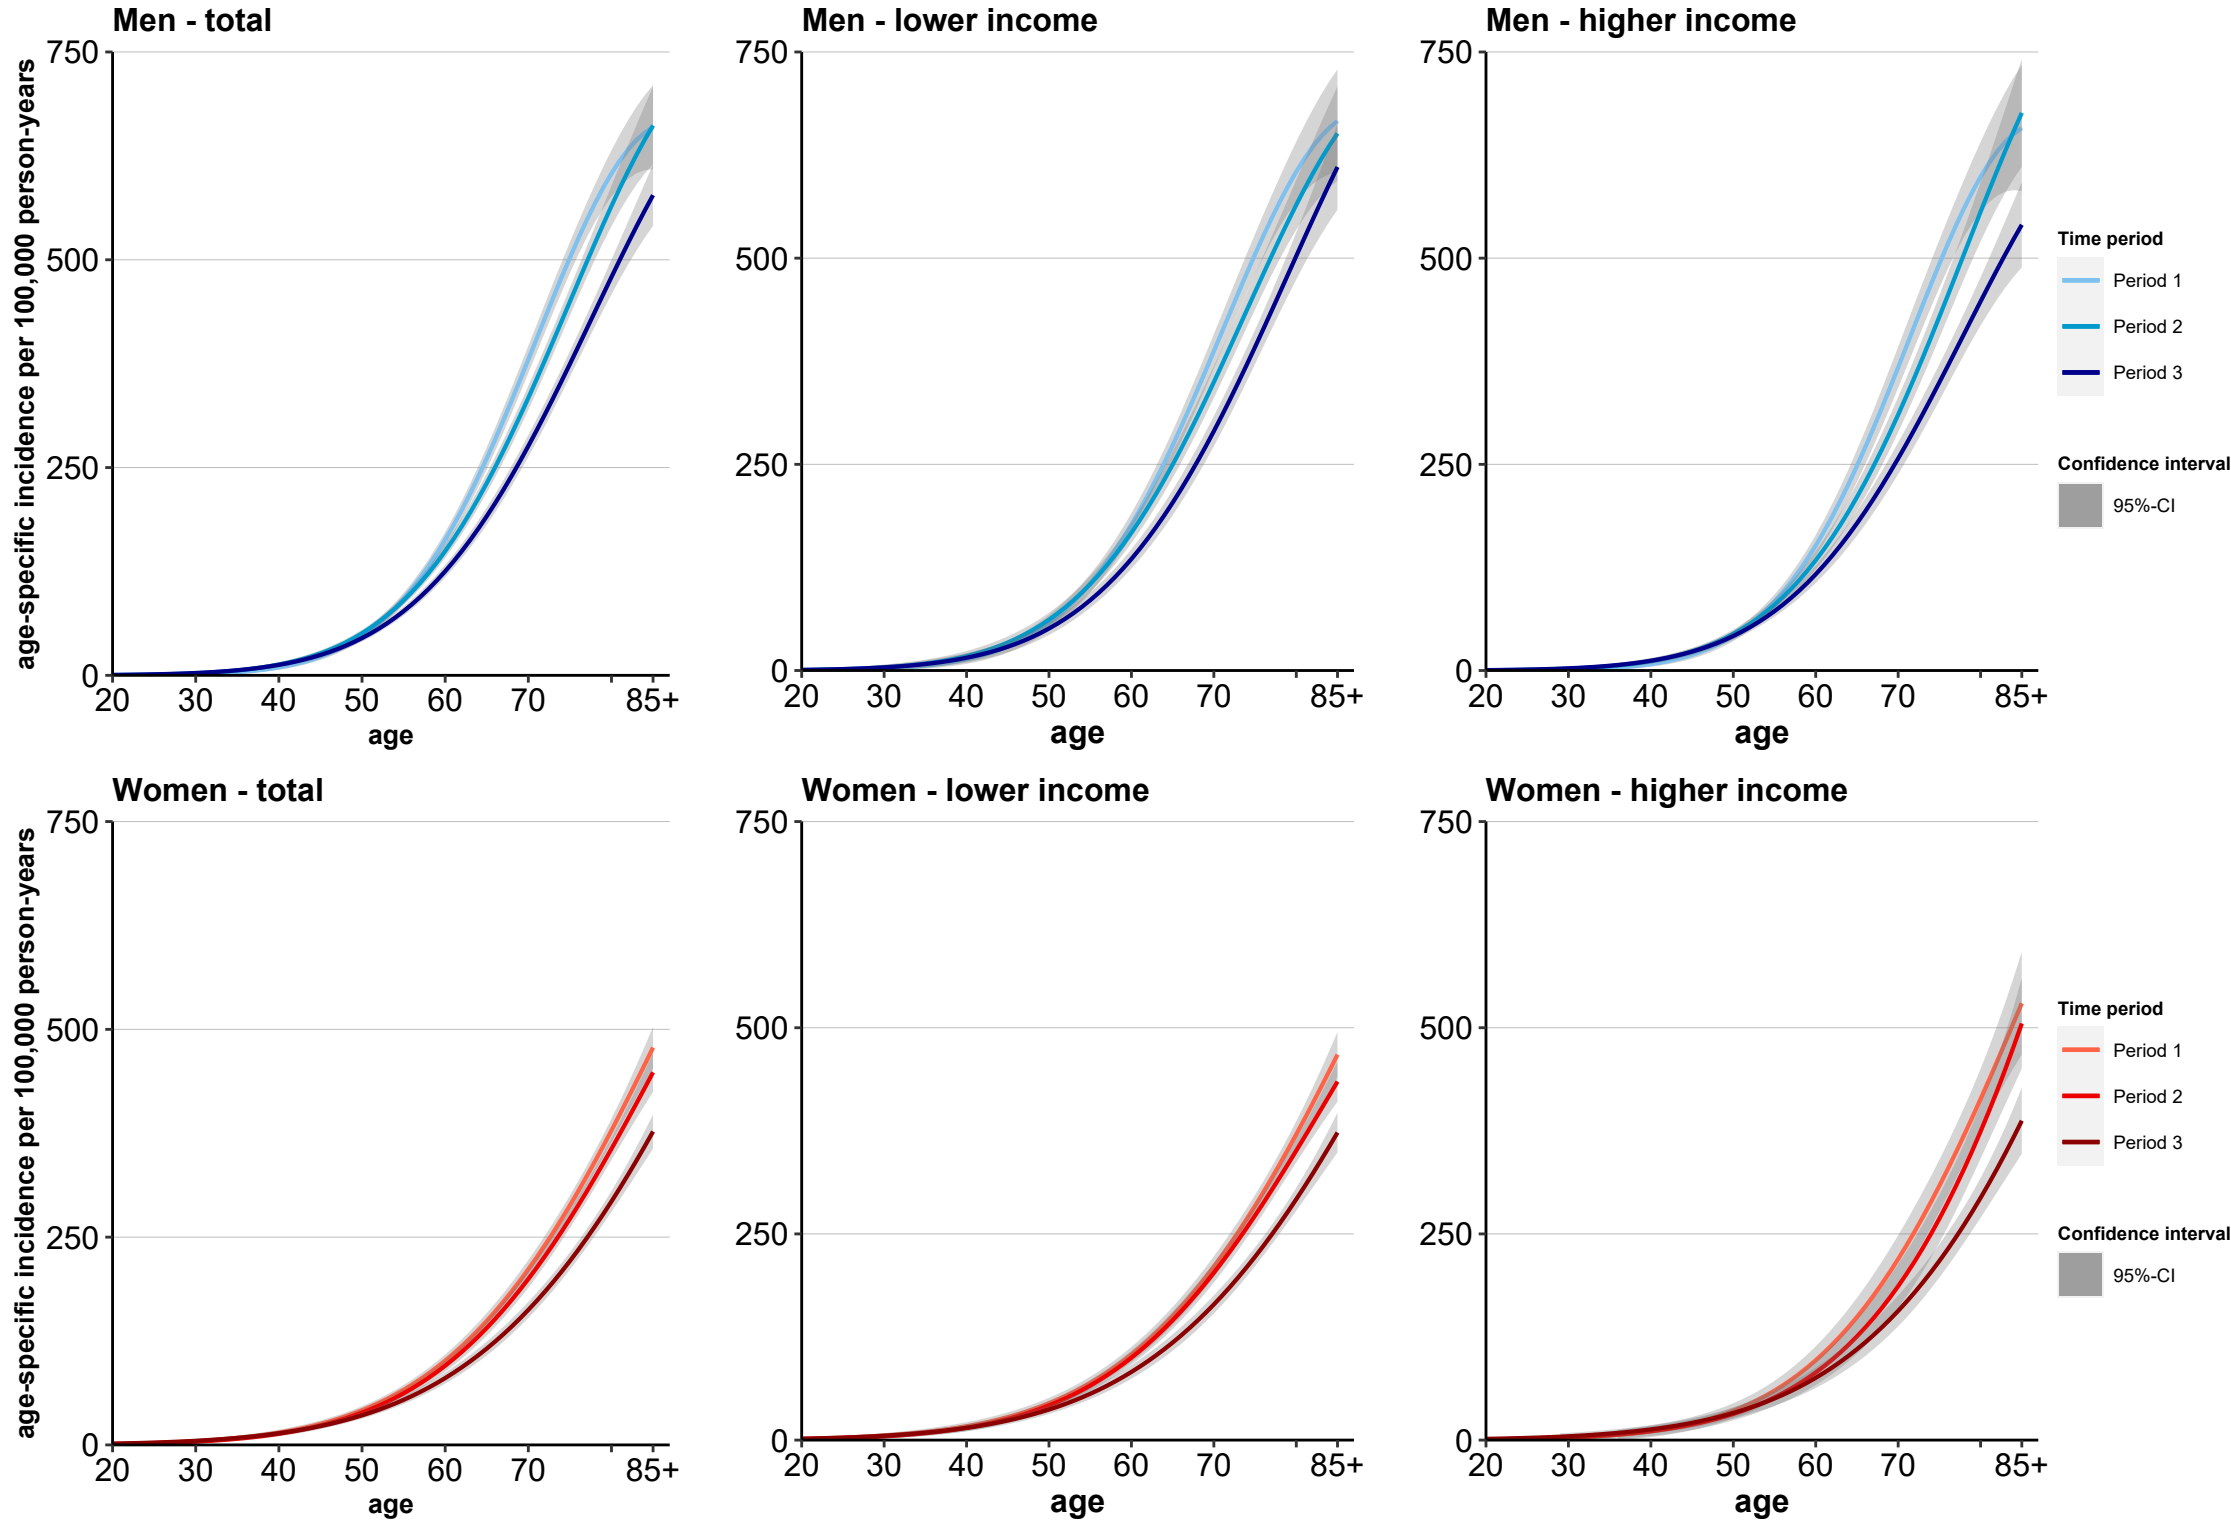

**Fig. S3 Time trend in age-specific lung cancer incidence per 100,000 person-years by sex and income group**

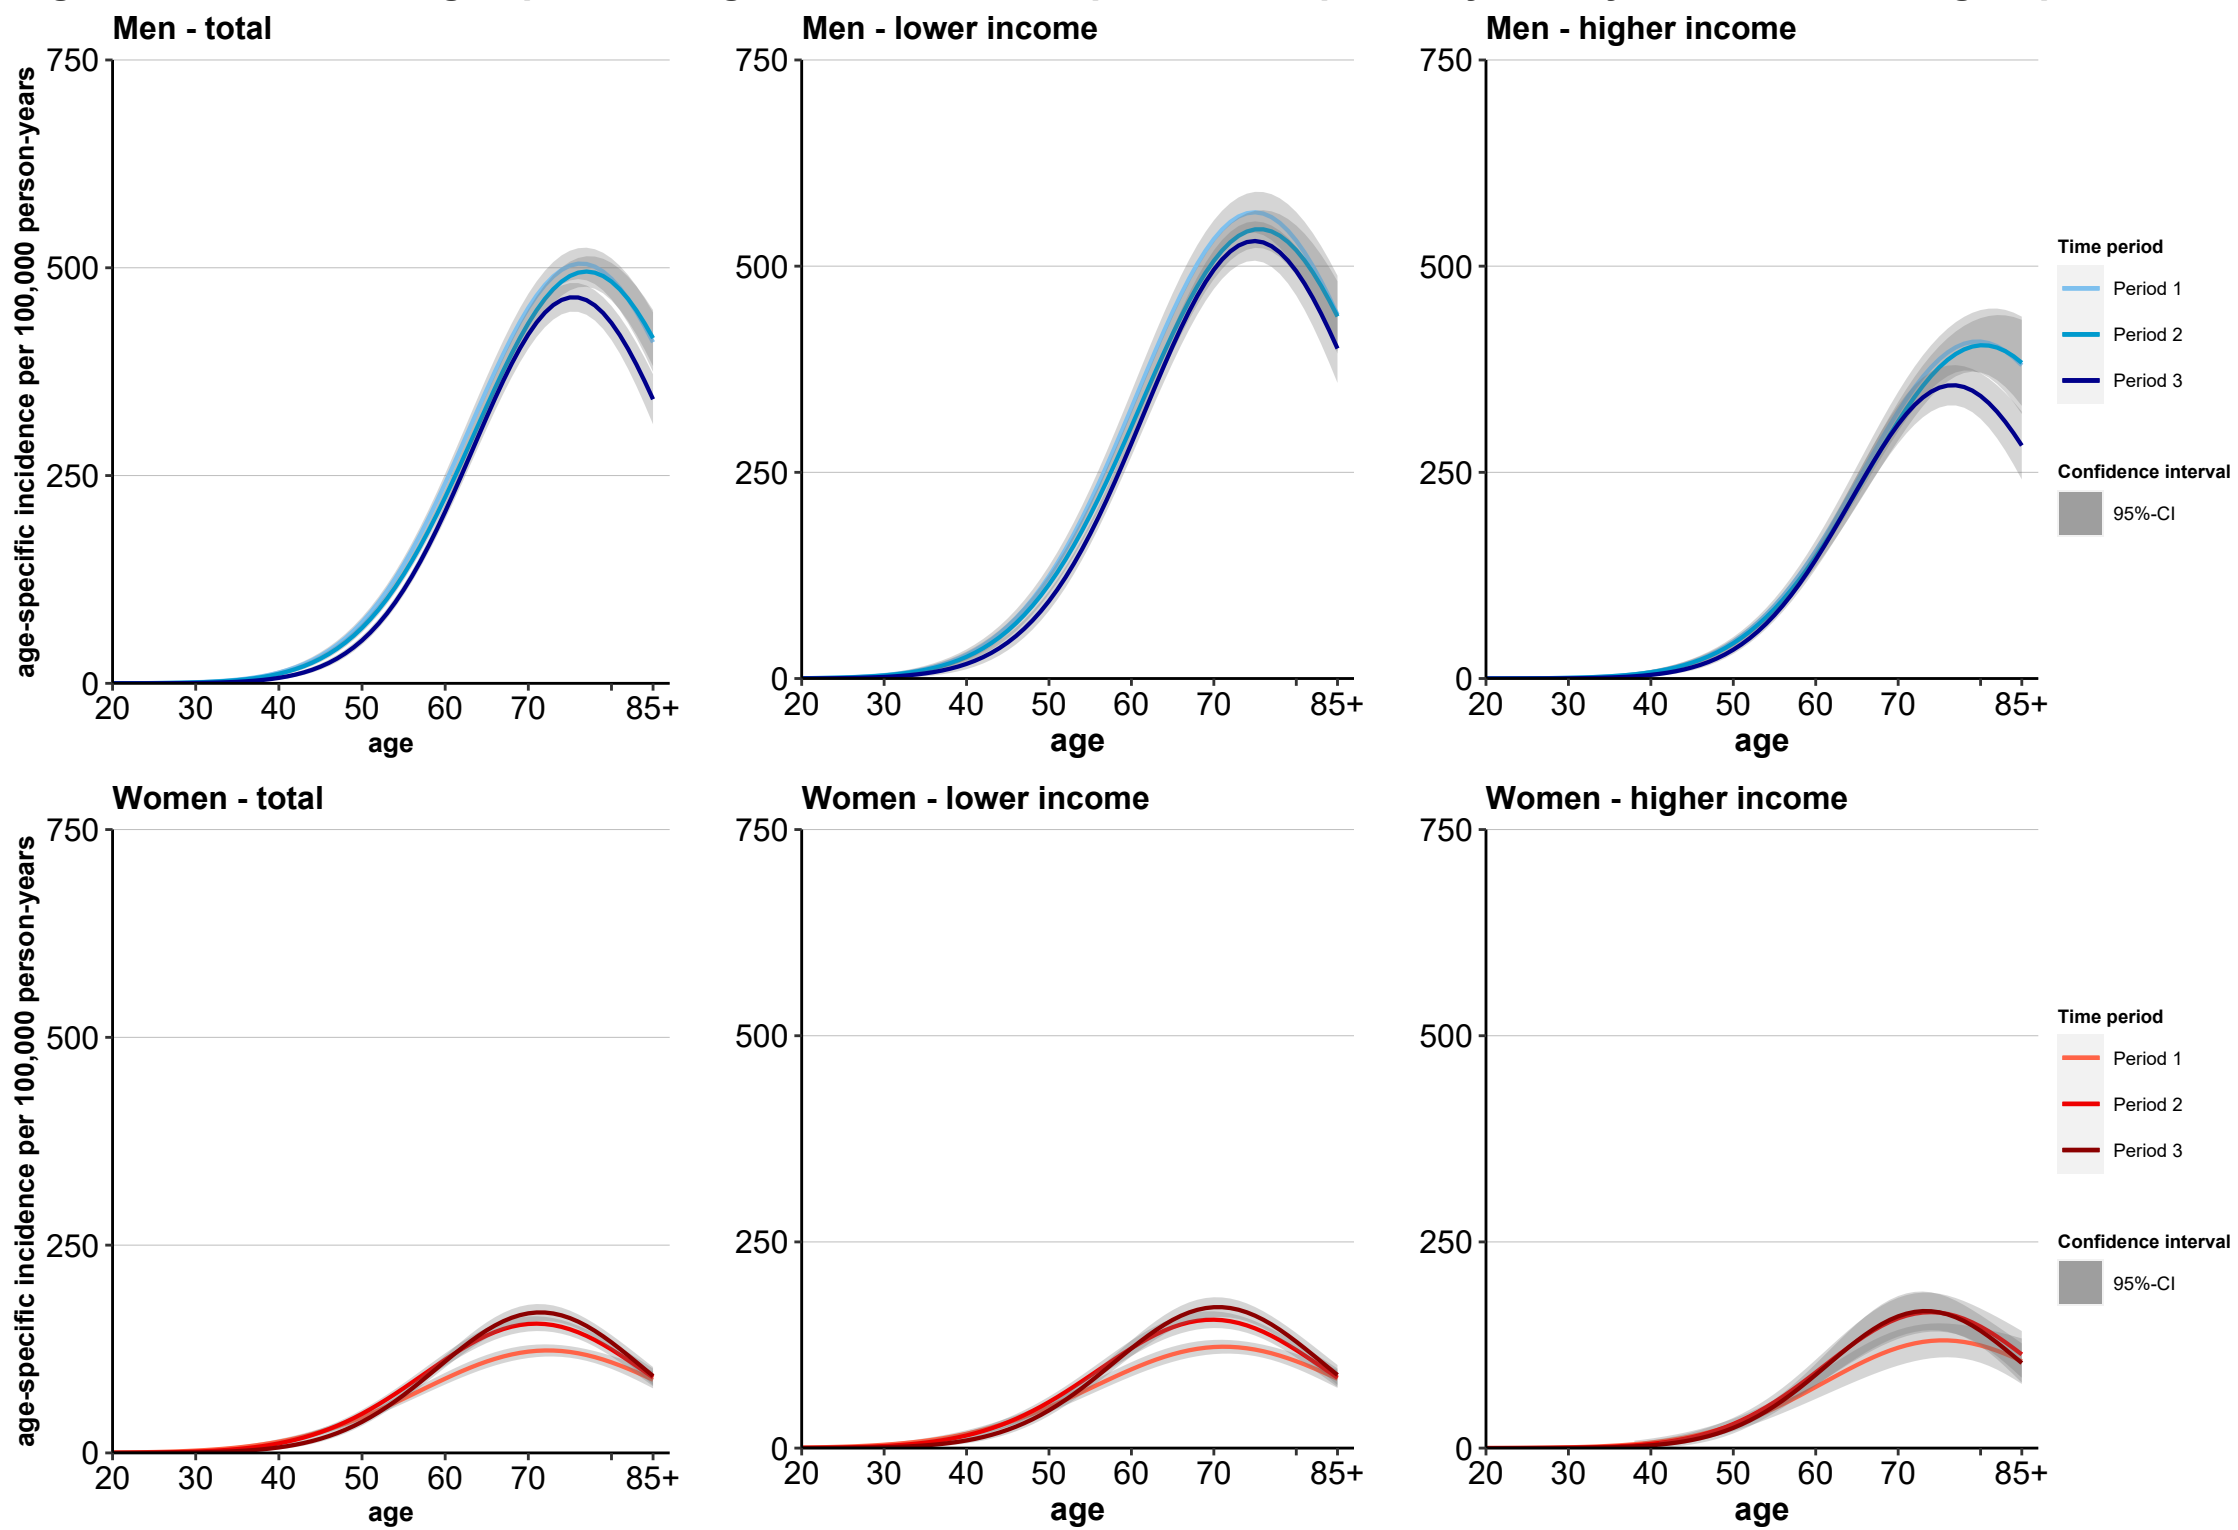

**Fig. S4 Time trend in age-specific stomach cancer incidence per 100,000 person-years by sex and income group**

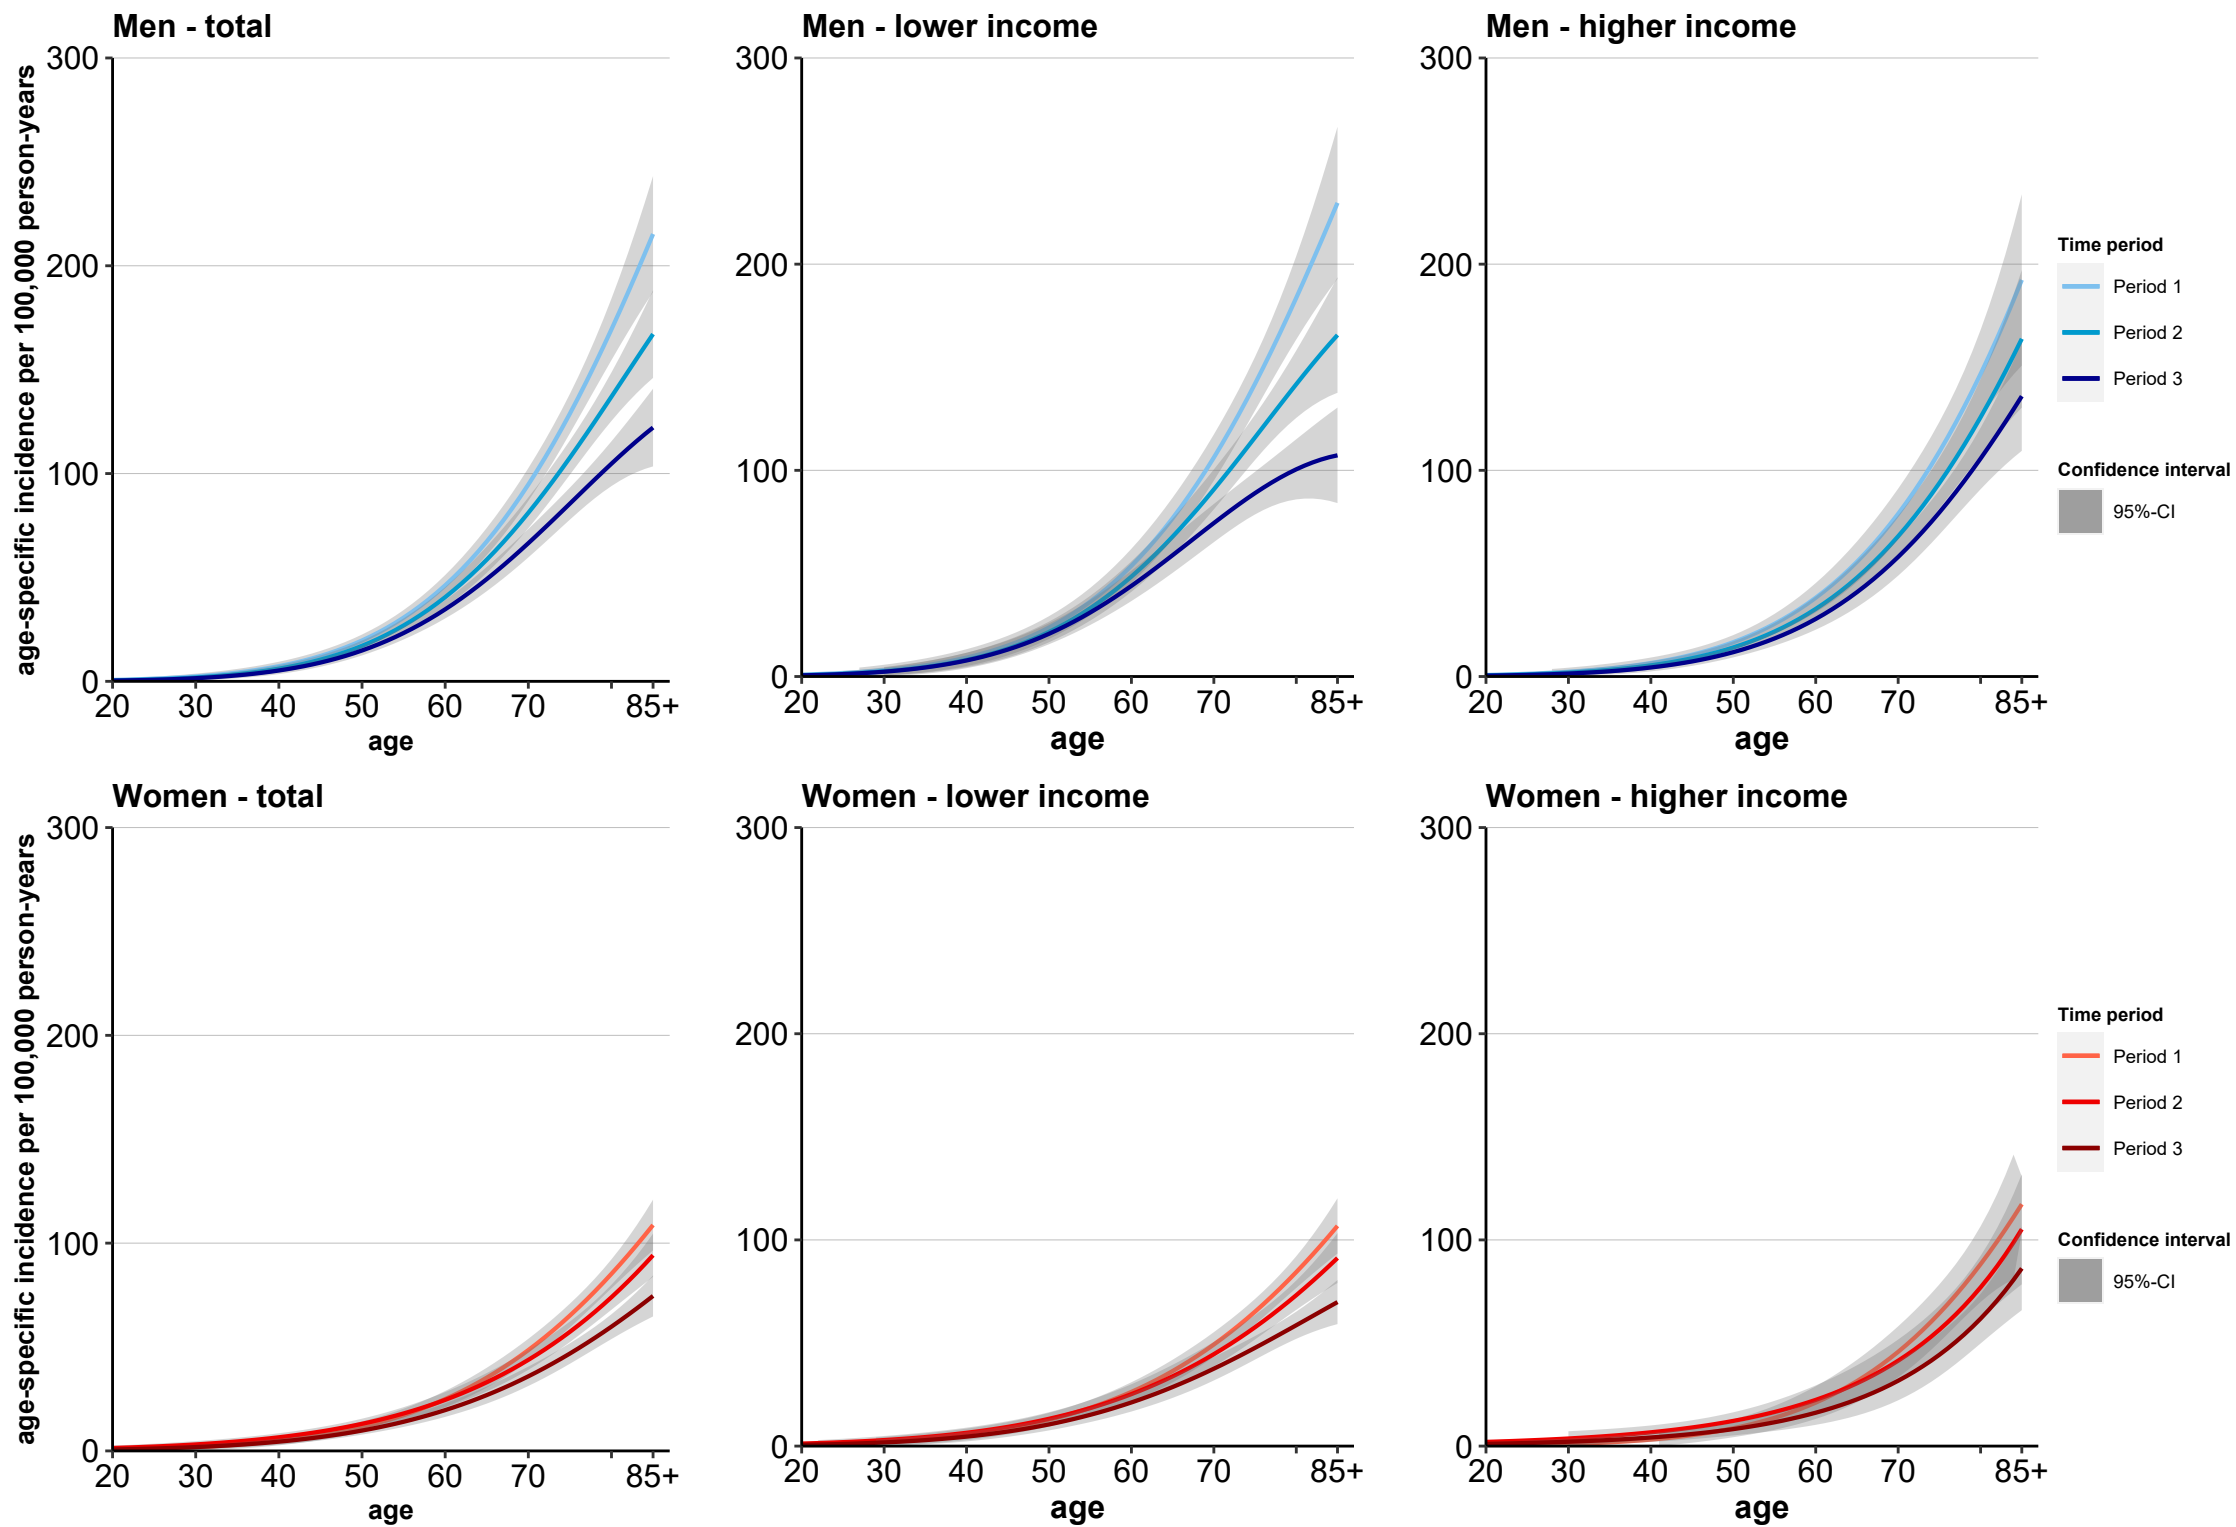

**Fig. S5 Time trend in age-specific skin cancer incidence per 100,000 person-years by sex and income group**

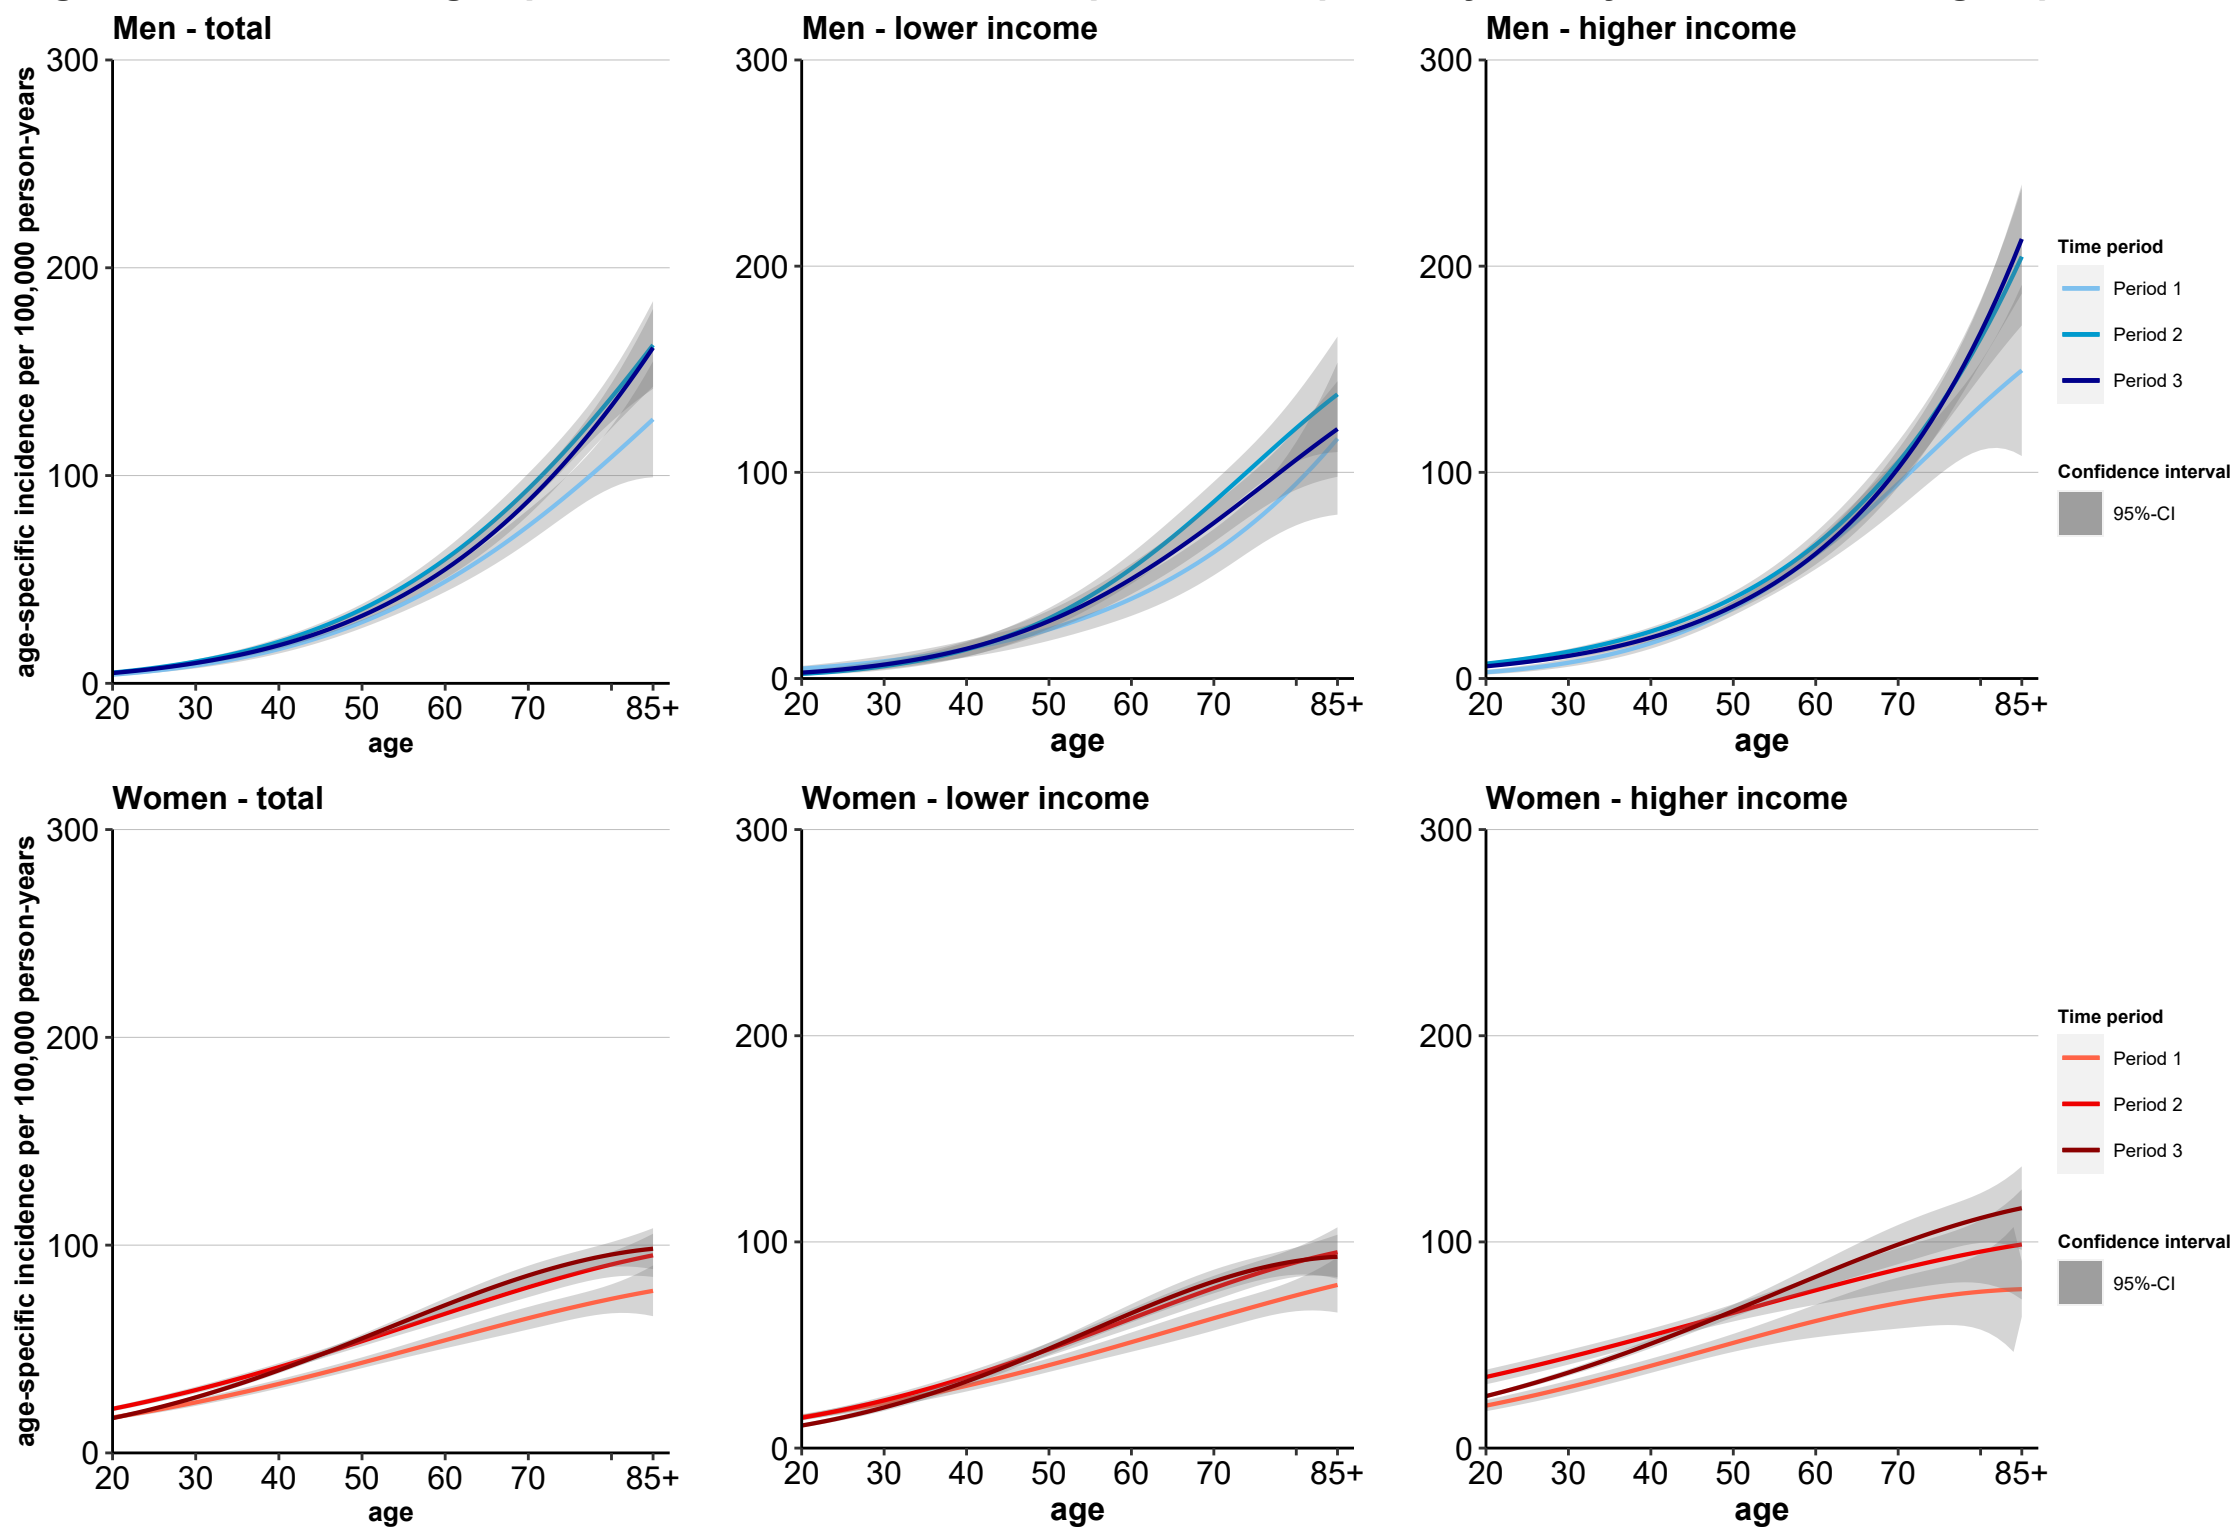

**Fig. S6 Time trend in age-specific incidence (prostate cancer, breast cancer, and cervix uteri) per 100,000 person-years by sex and income group**

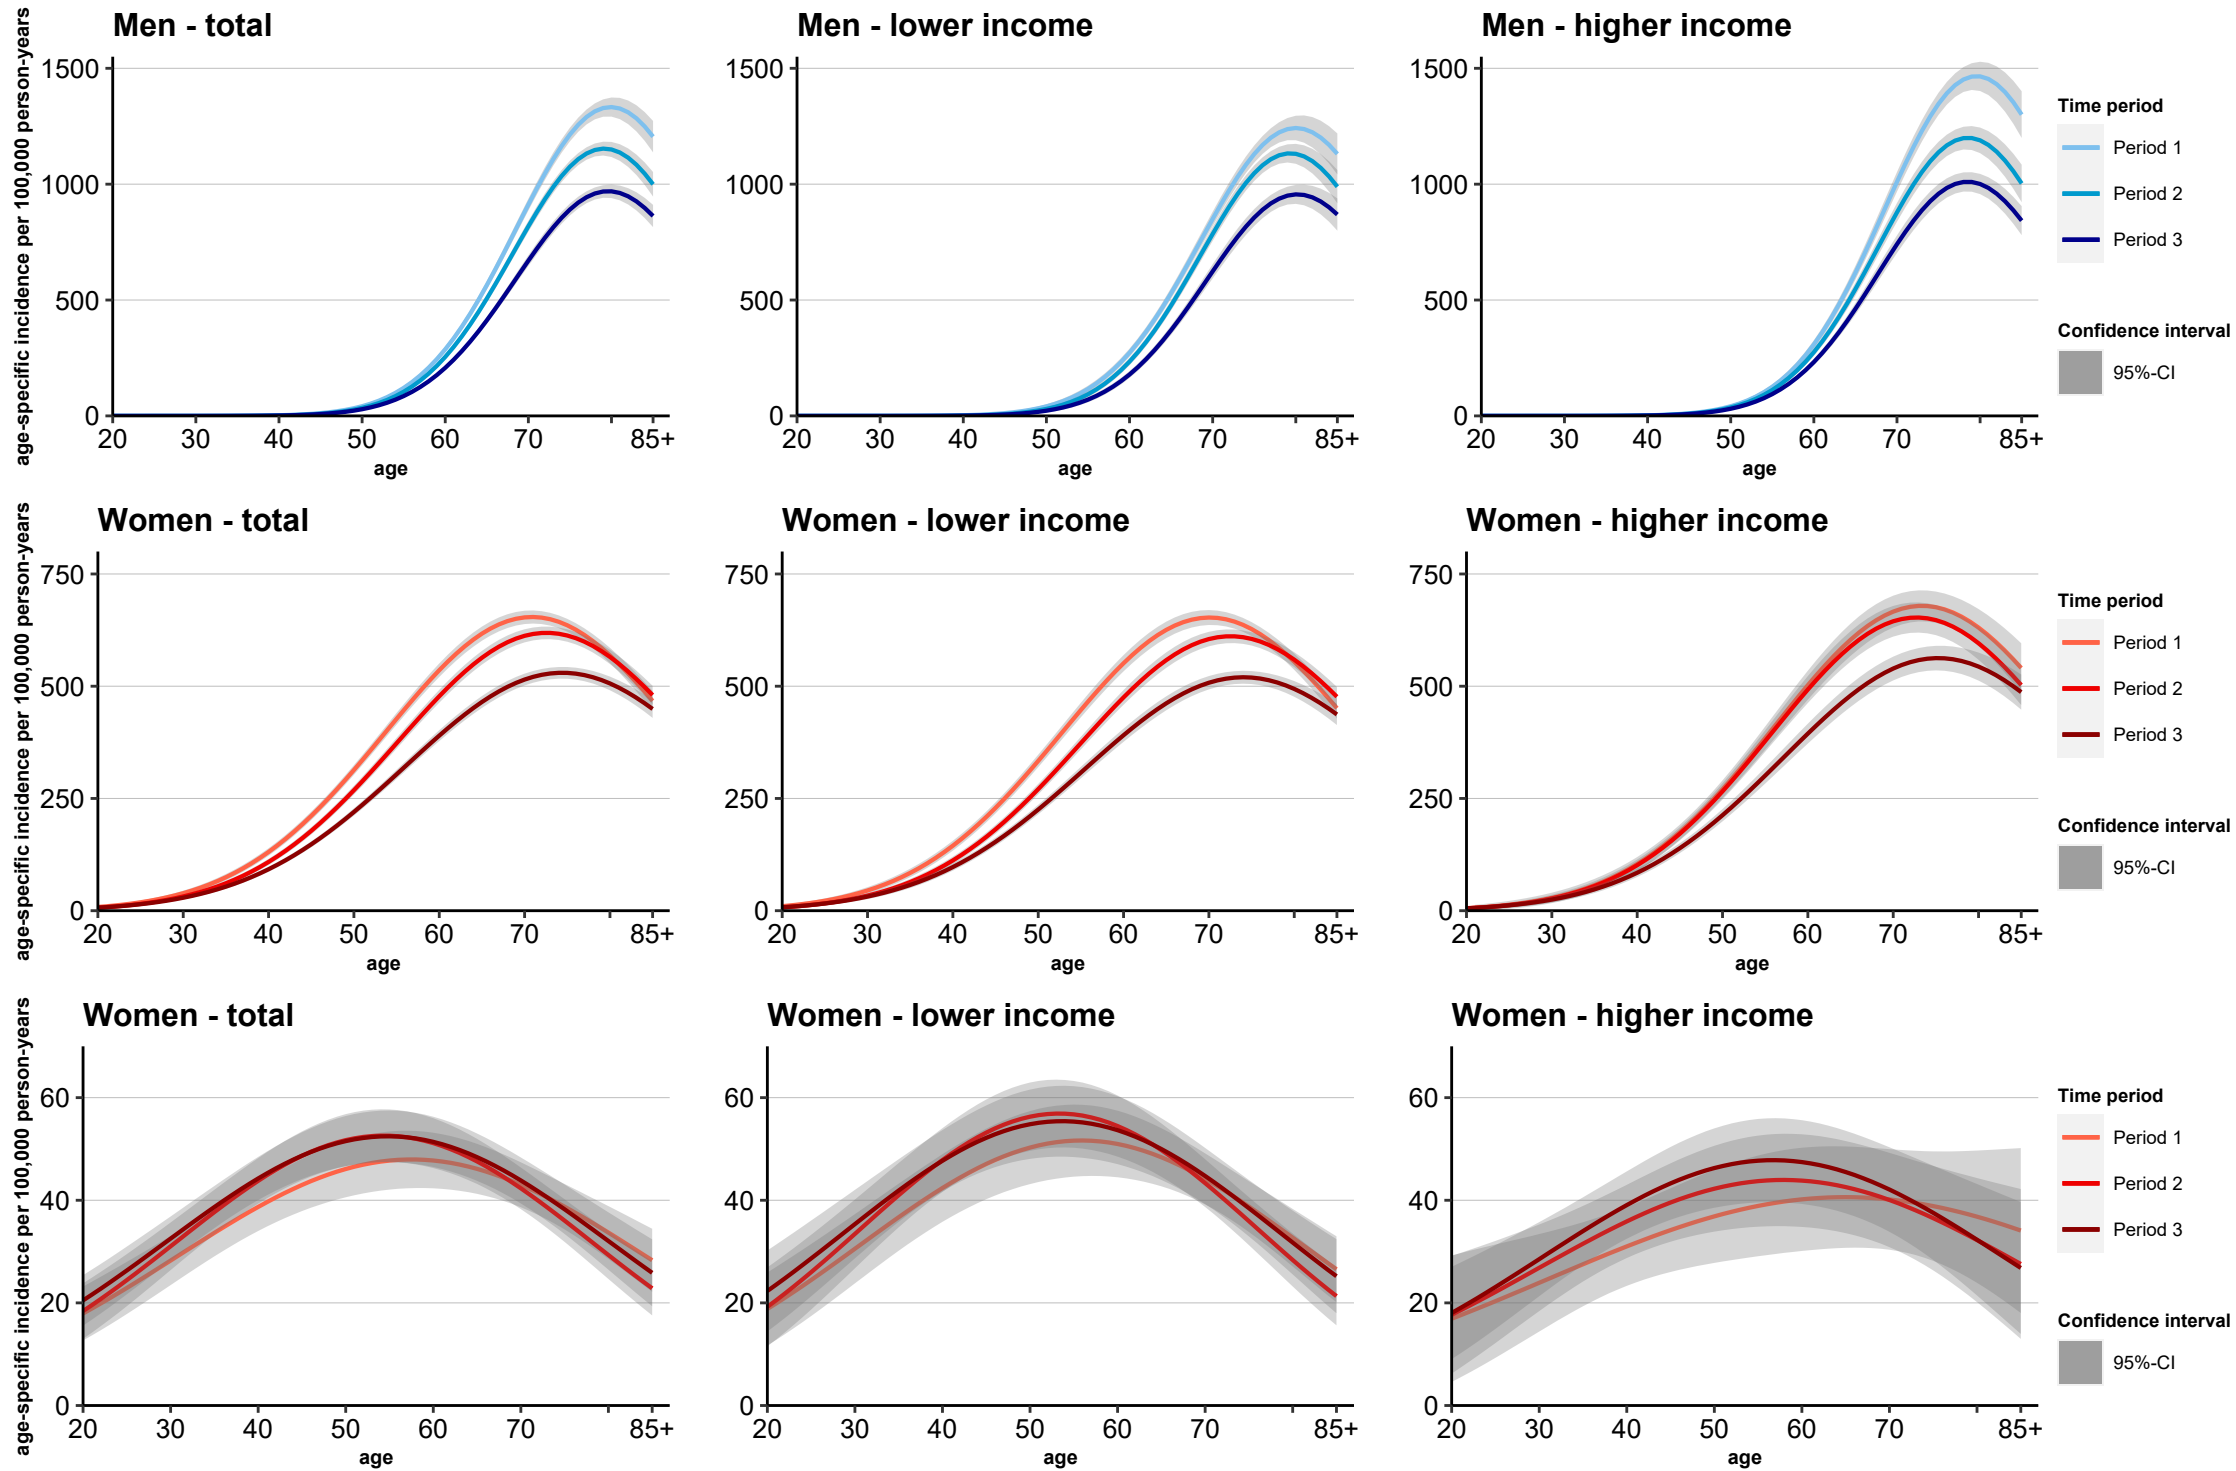

**Fig. S7 Time trend in age-specific other cancer incidence per 100,000 person-years by sex and income group**

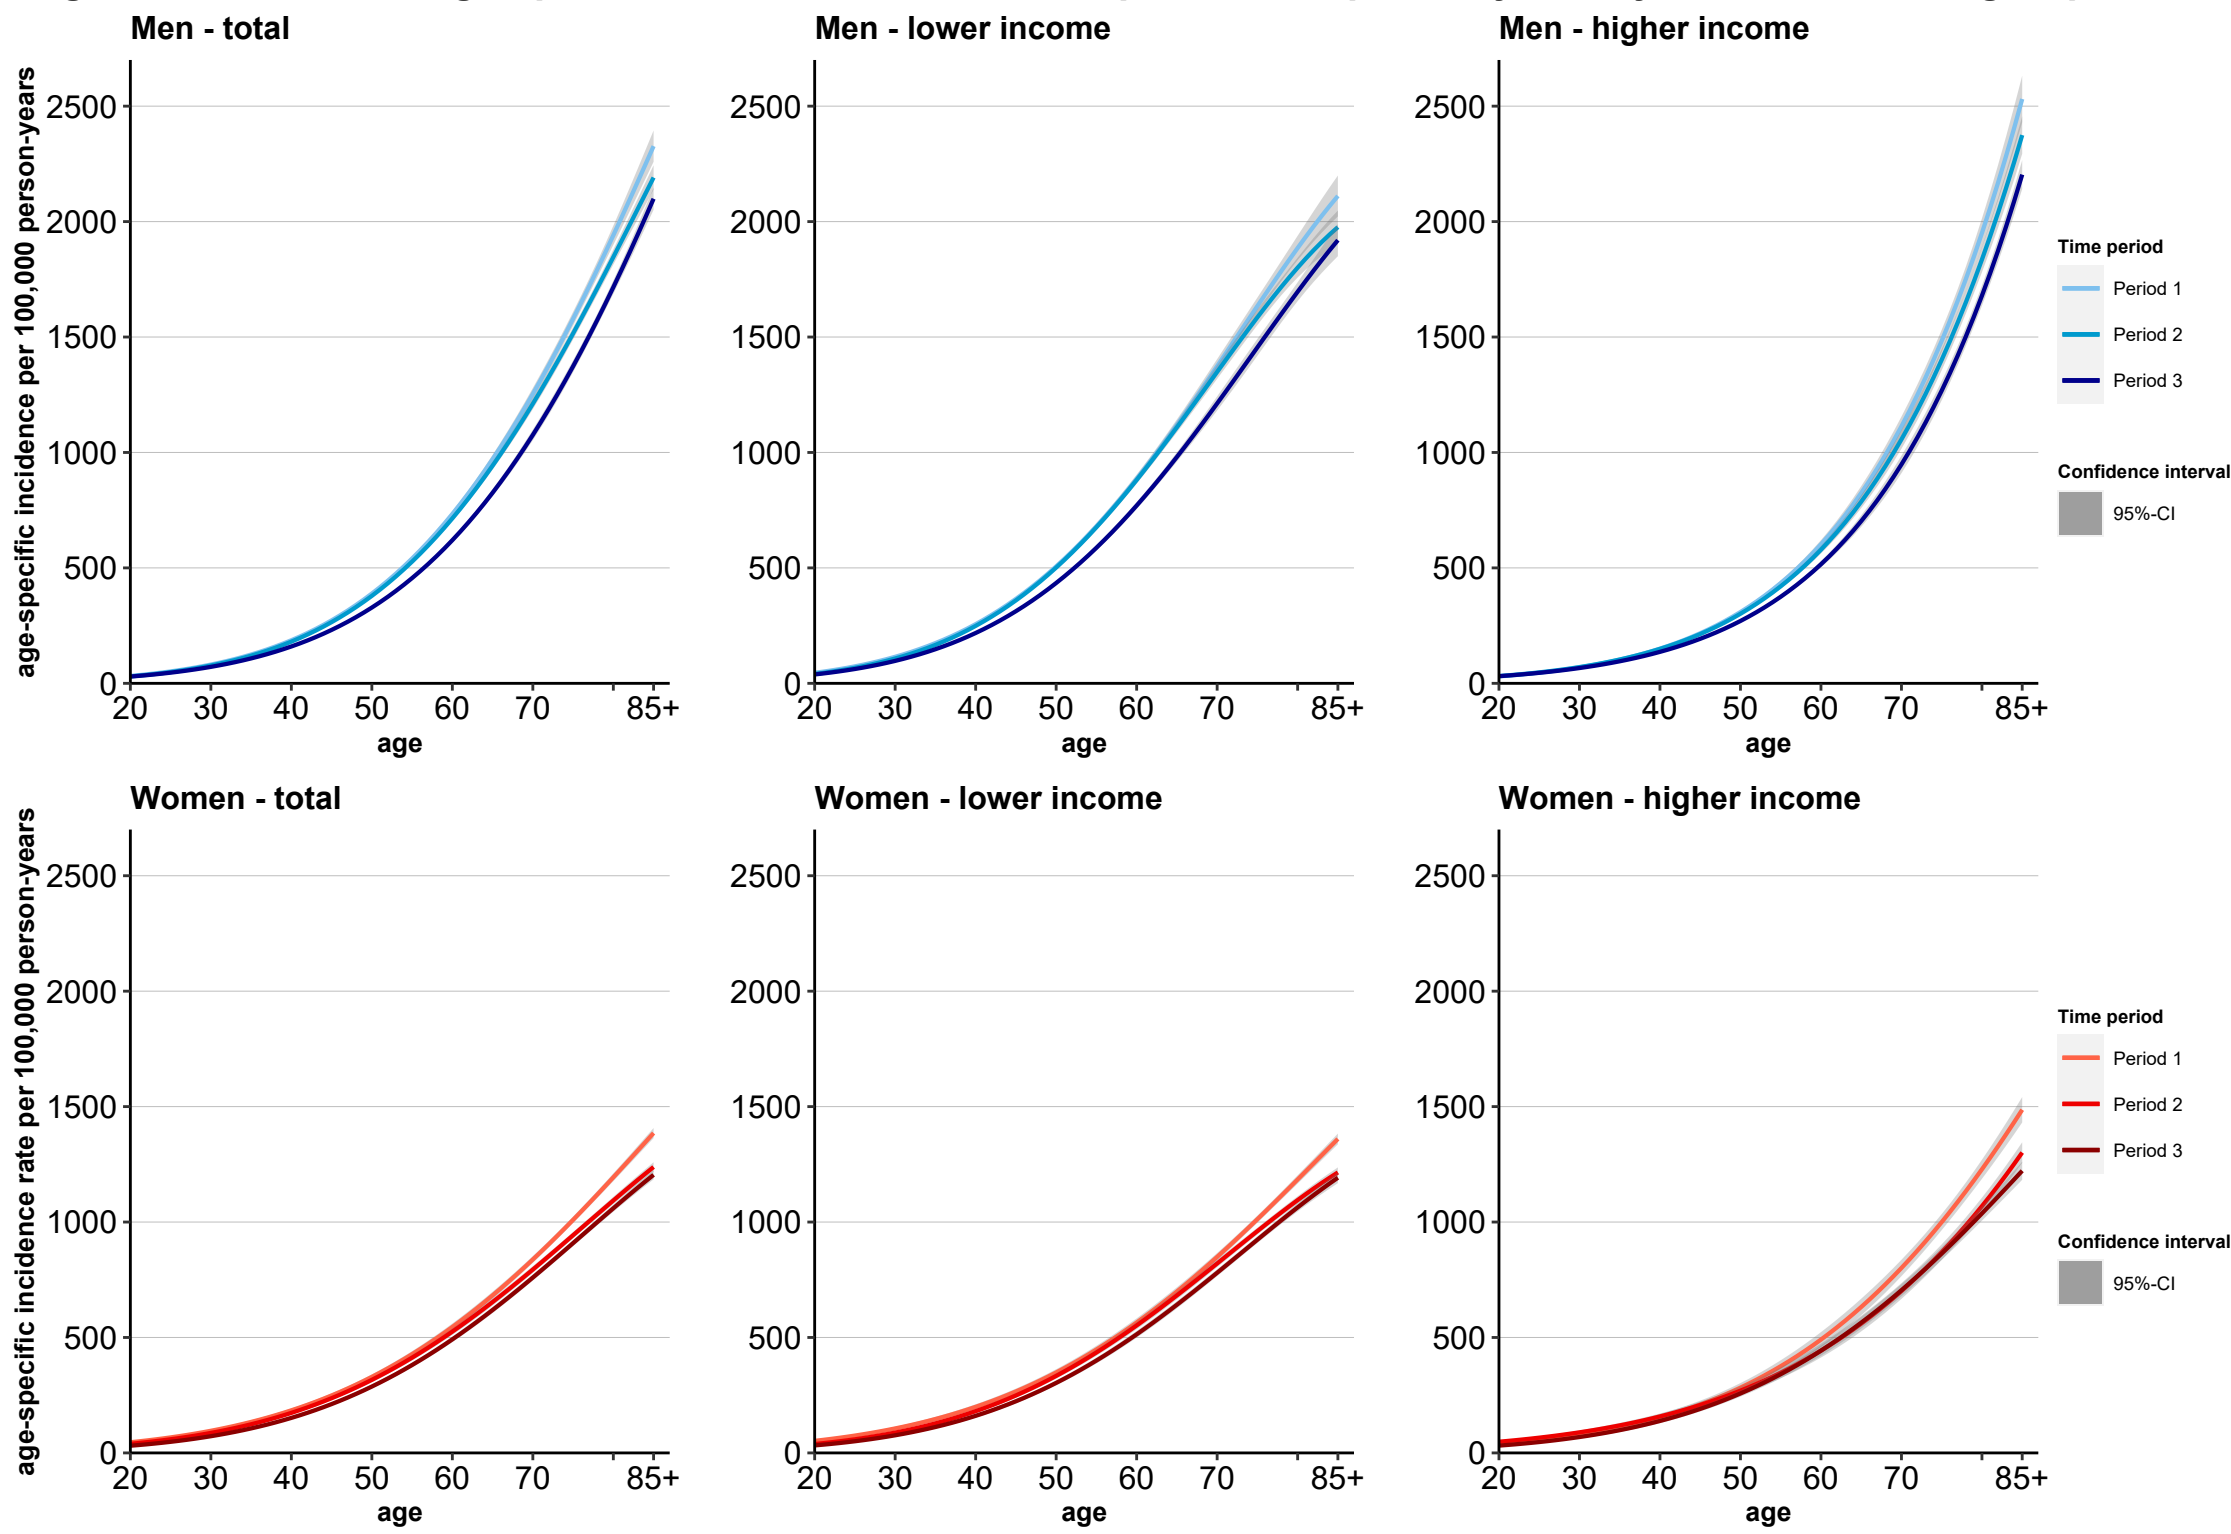



**Fig. S8 Time trend in income inequality in cancer risk in men and women**

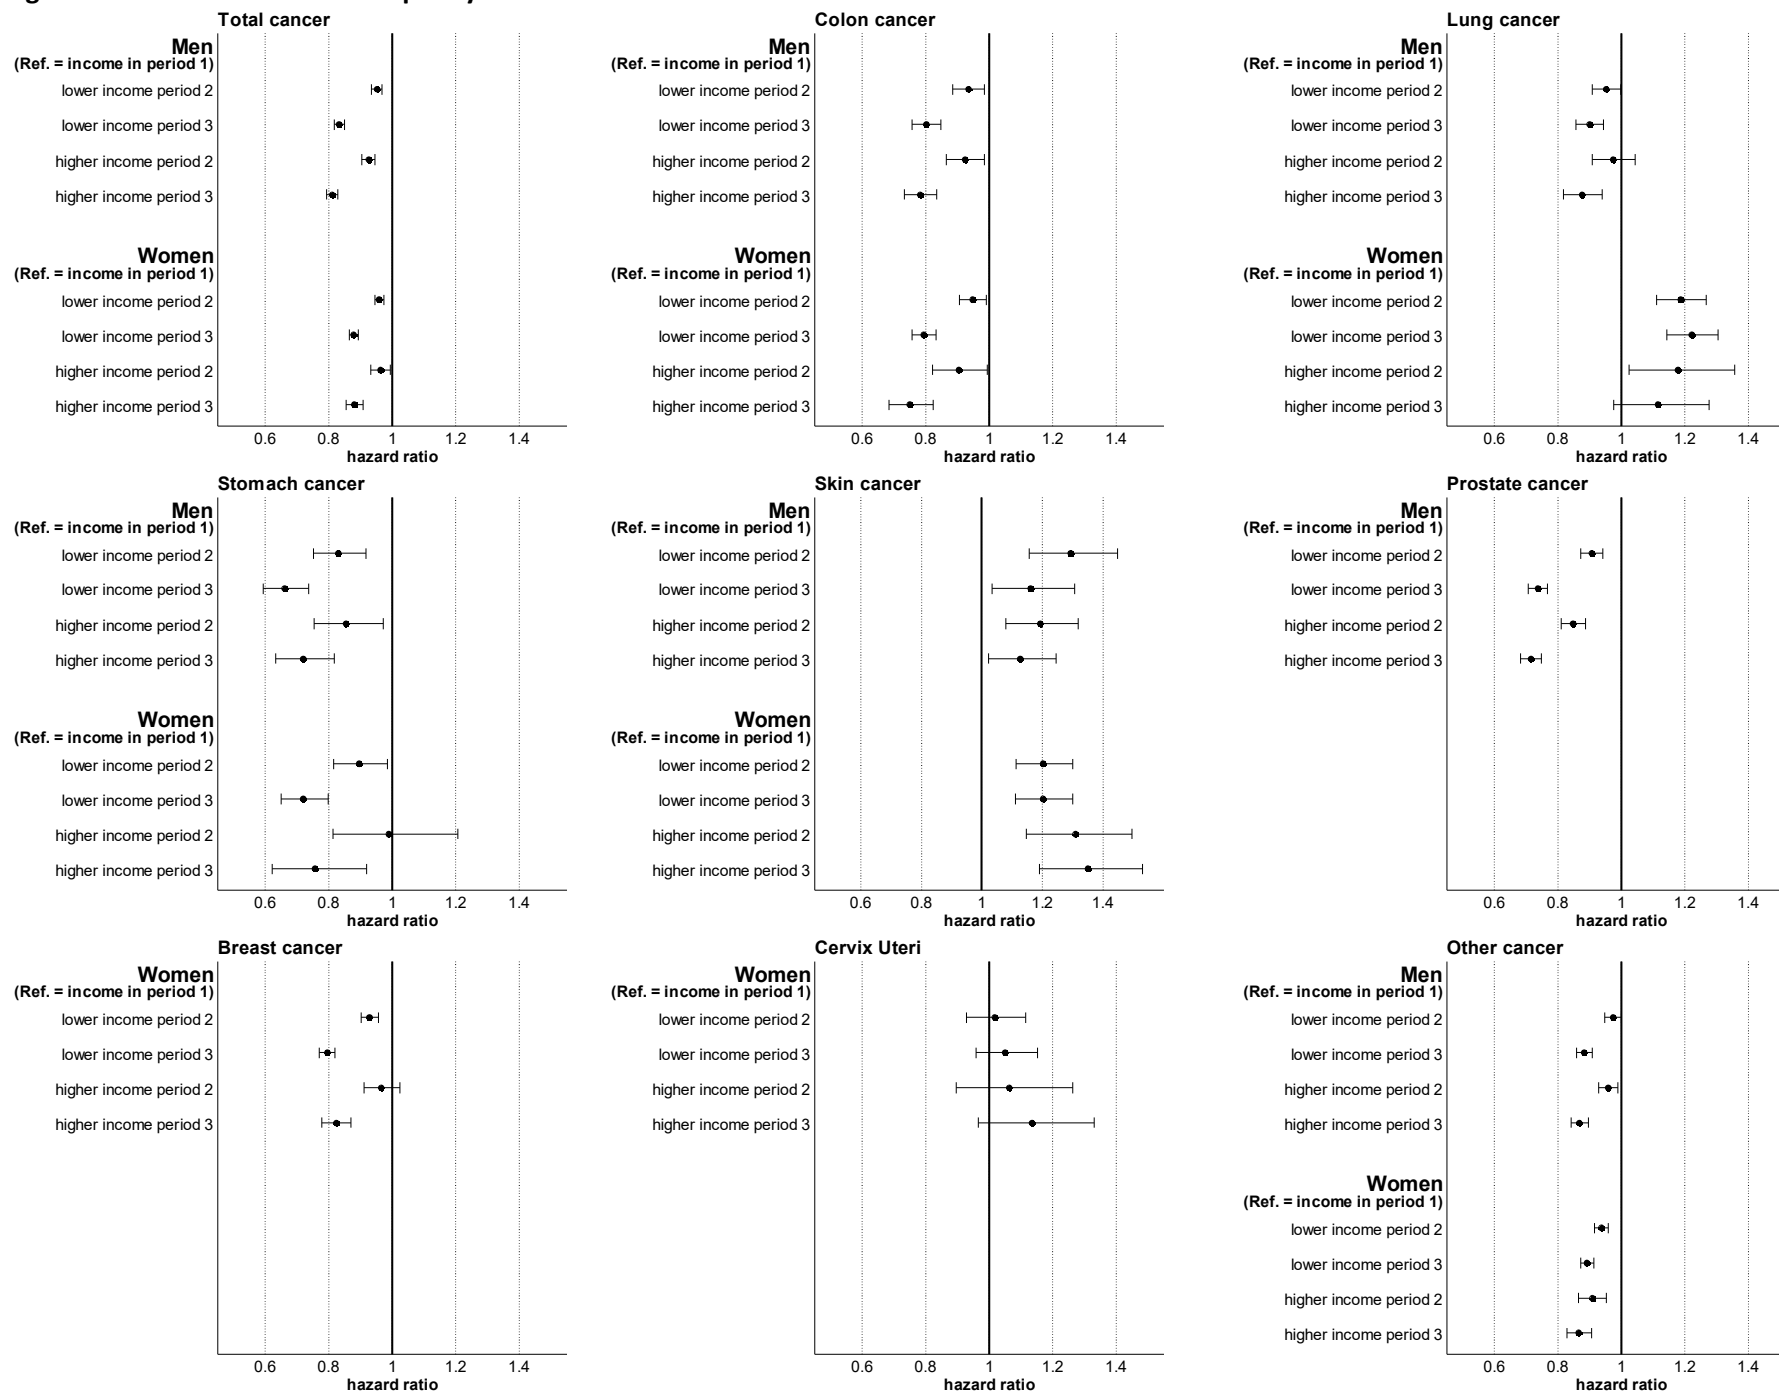

Note: All models were stratified for sex and income group, and are controlled for age (in single-year age groups as second-degree polynomial) and period, and were performed separately for total cancer and the single-cancer sites

**Fig. S9 Time trend in cancer-free life expectancy in total cancer by sex and income group**

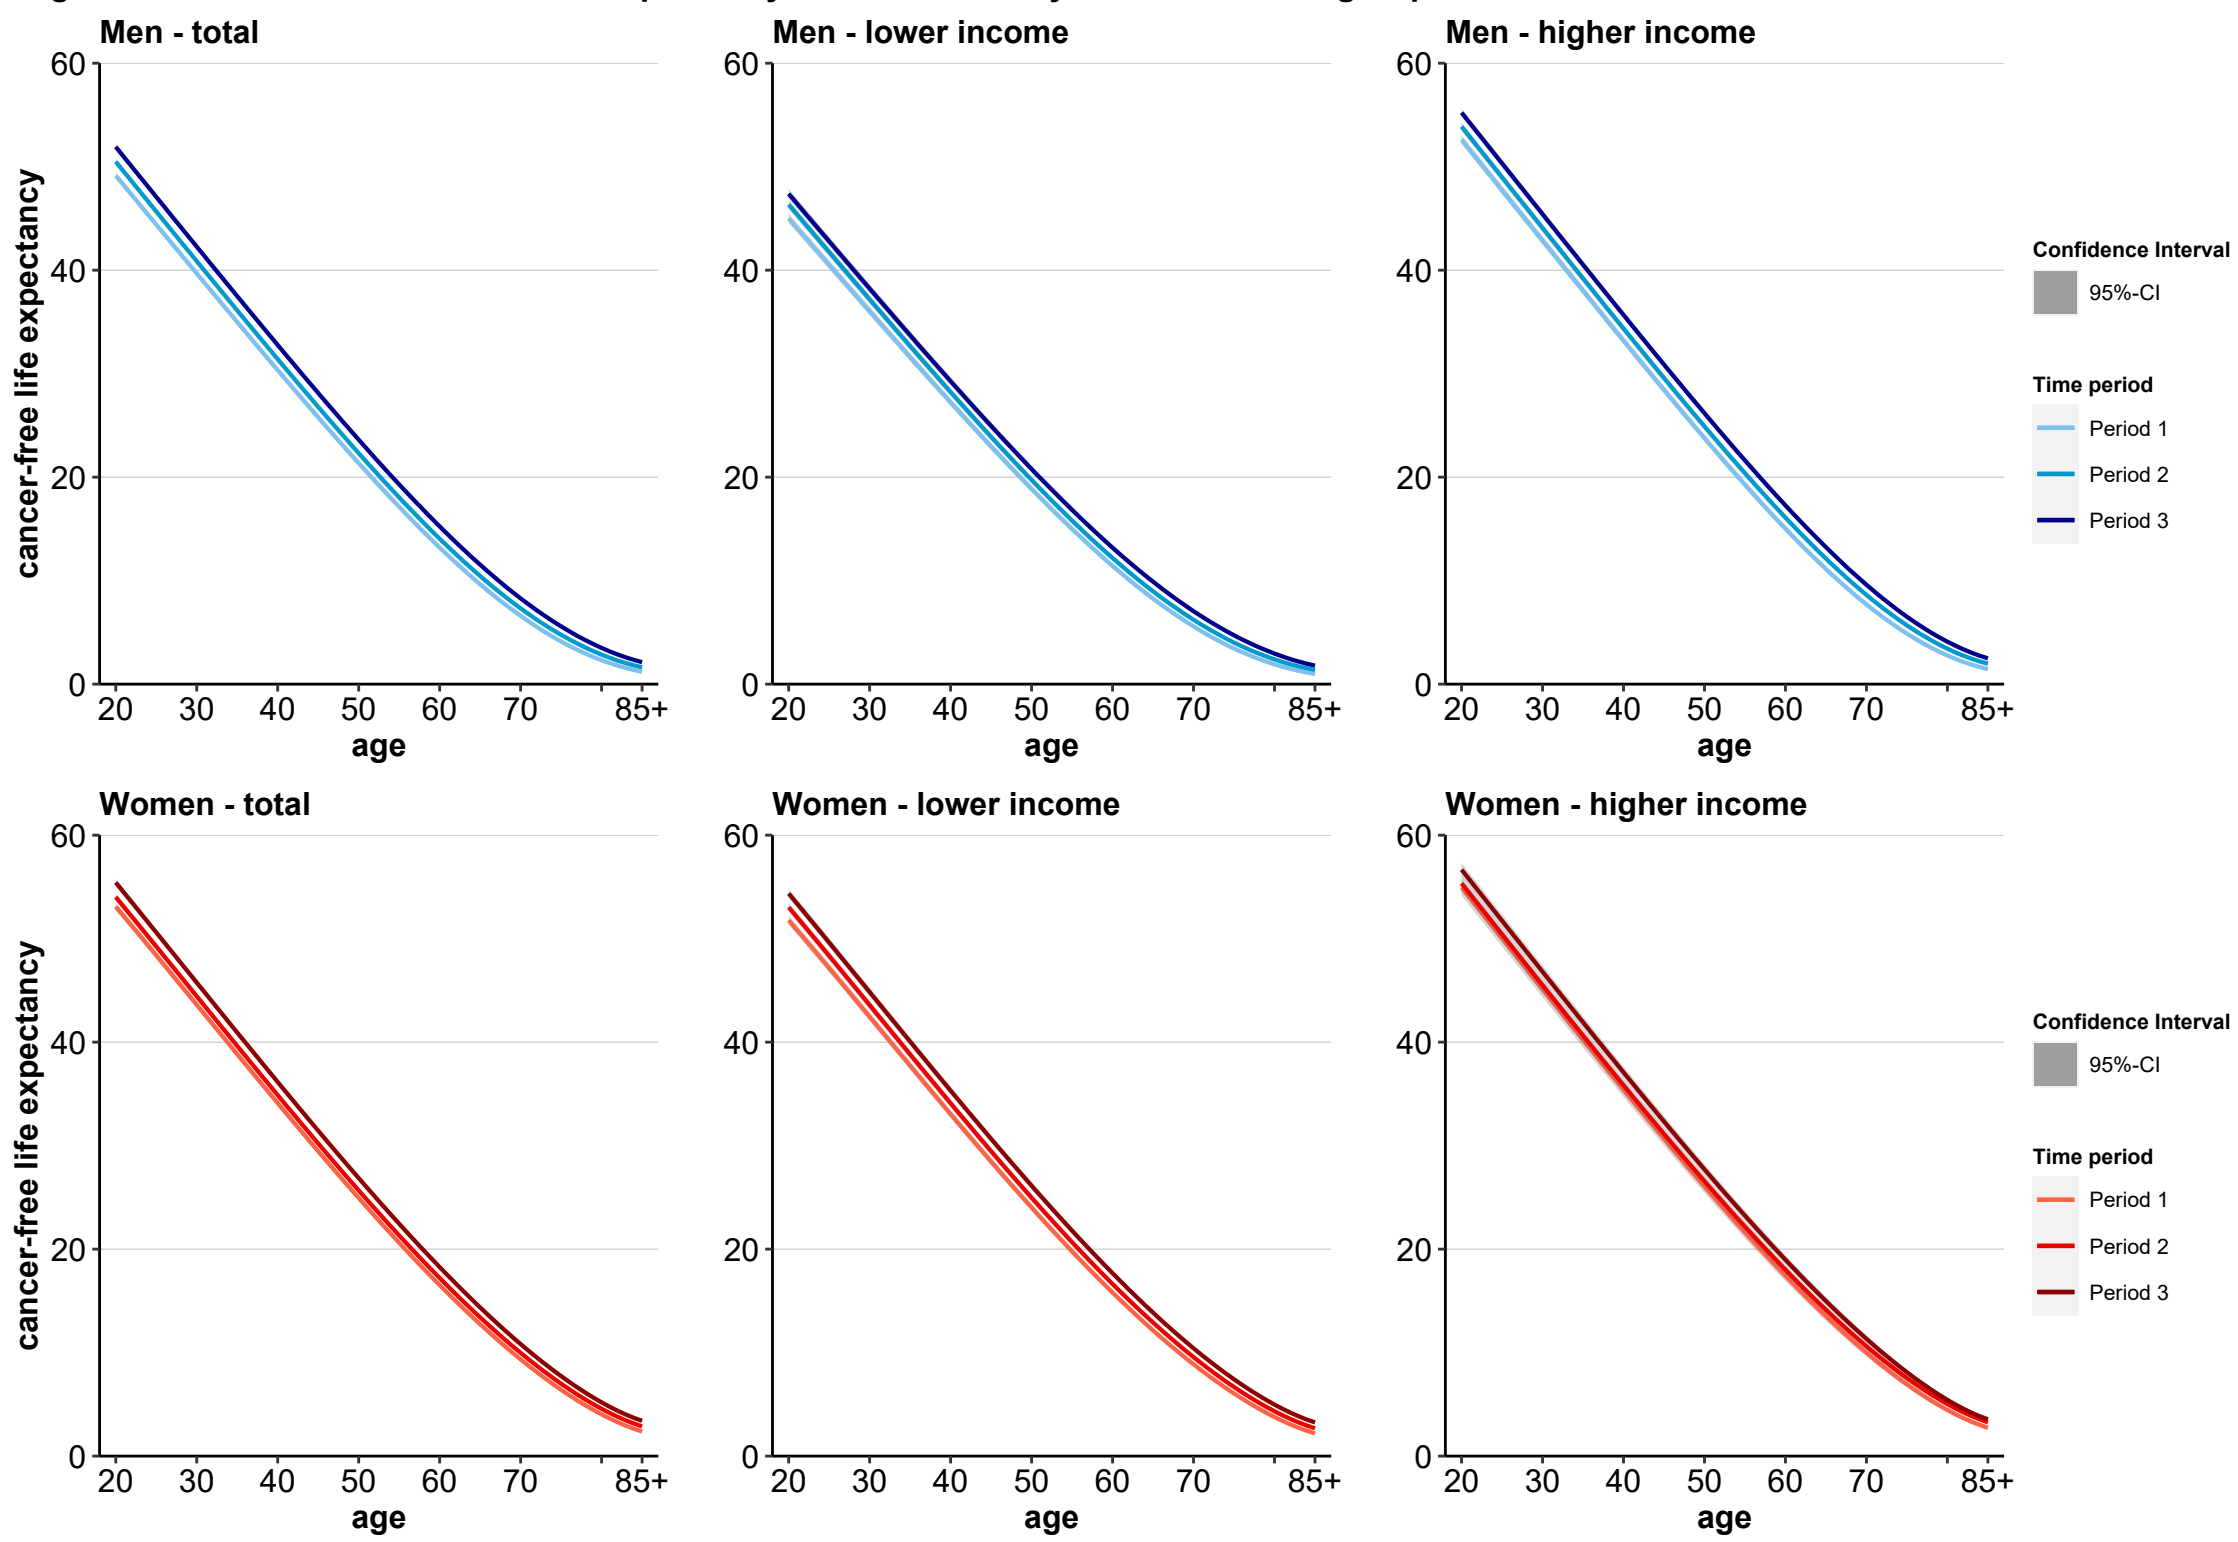

Fig. S10 Time trend in cancer-free life expectancy in colon cancer by sex and income group

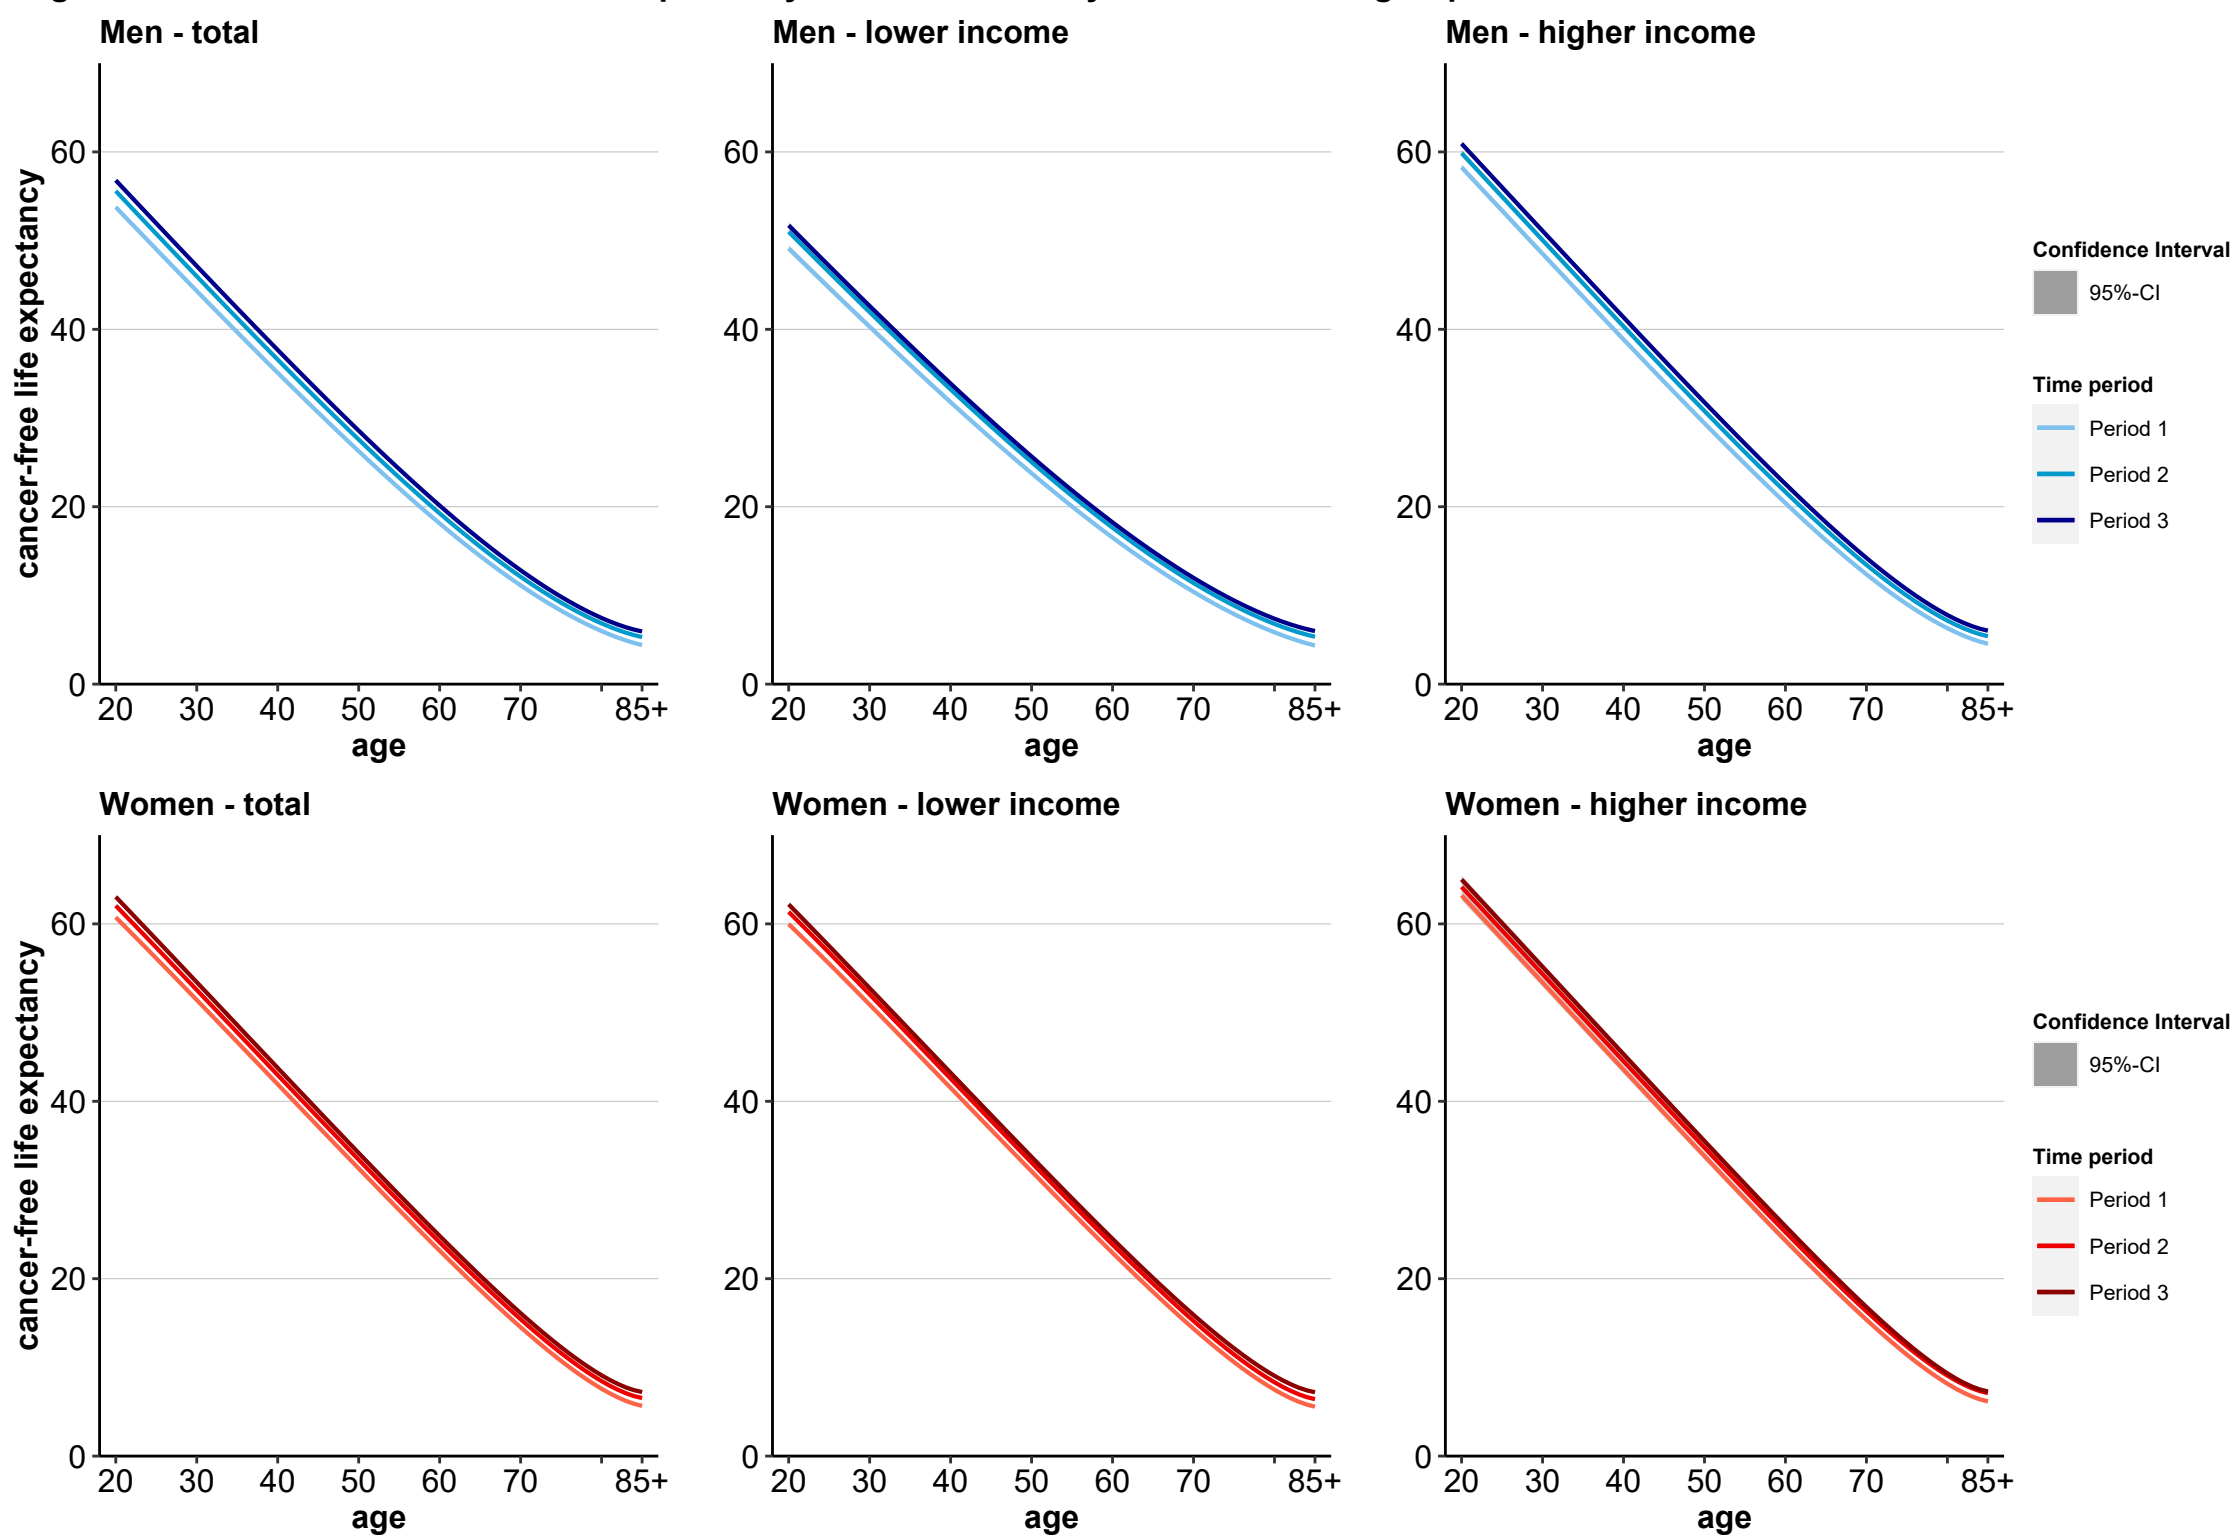

Fig. S11 Time trend in cancer-free life expectancy in lung cancer by sex and income group

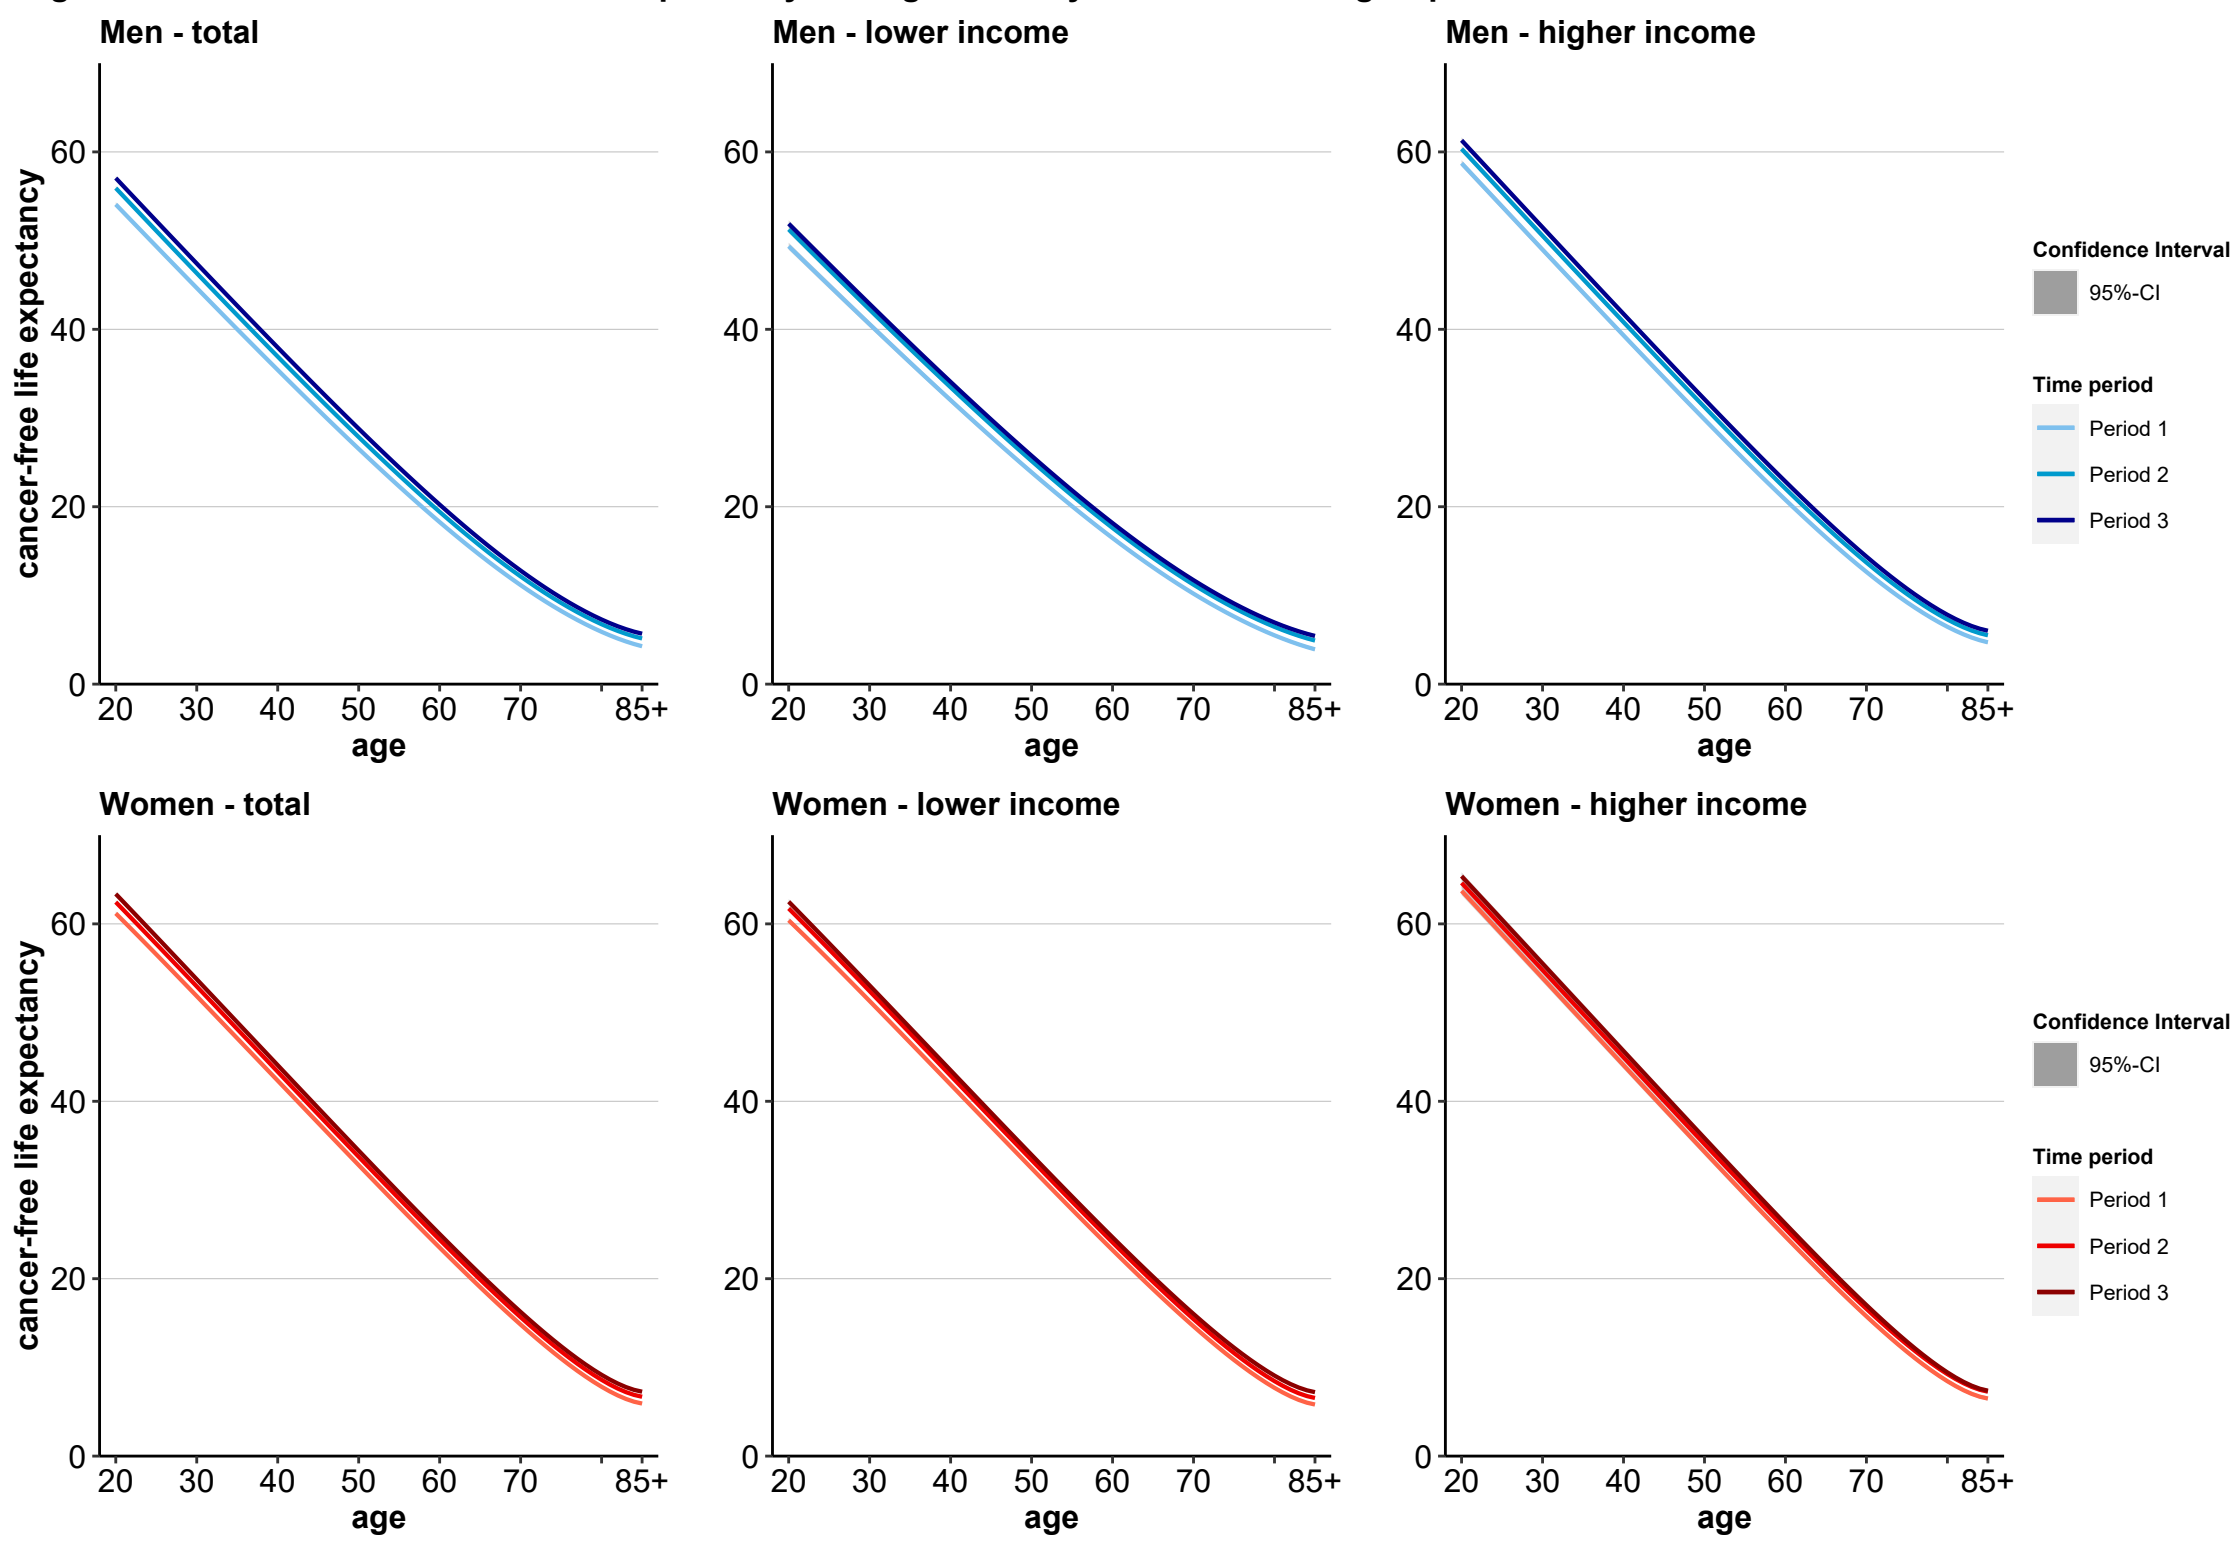

Fig S12 Time trend in cancer-free life expectancy in stomach cancer by sex and income group

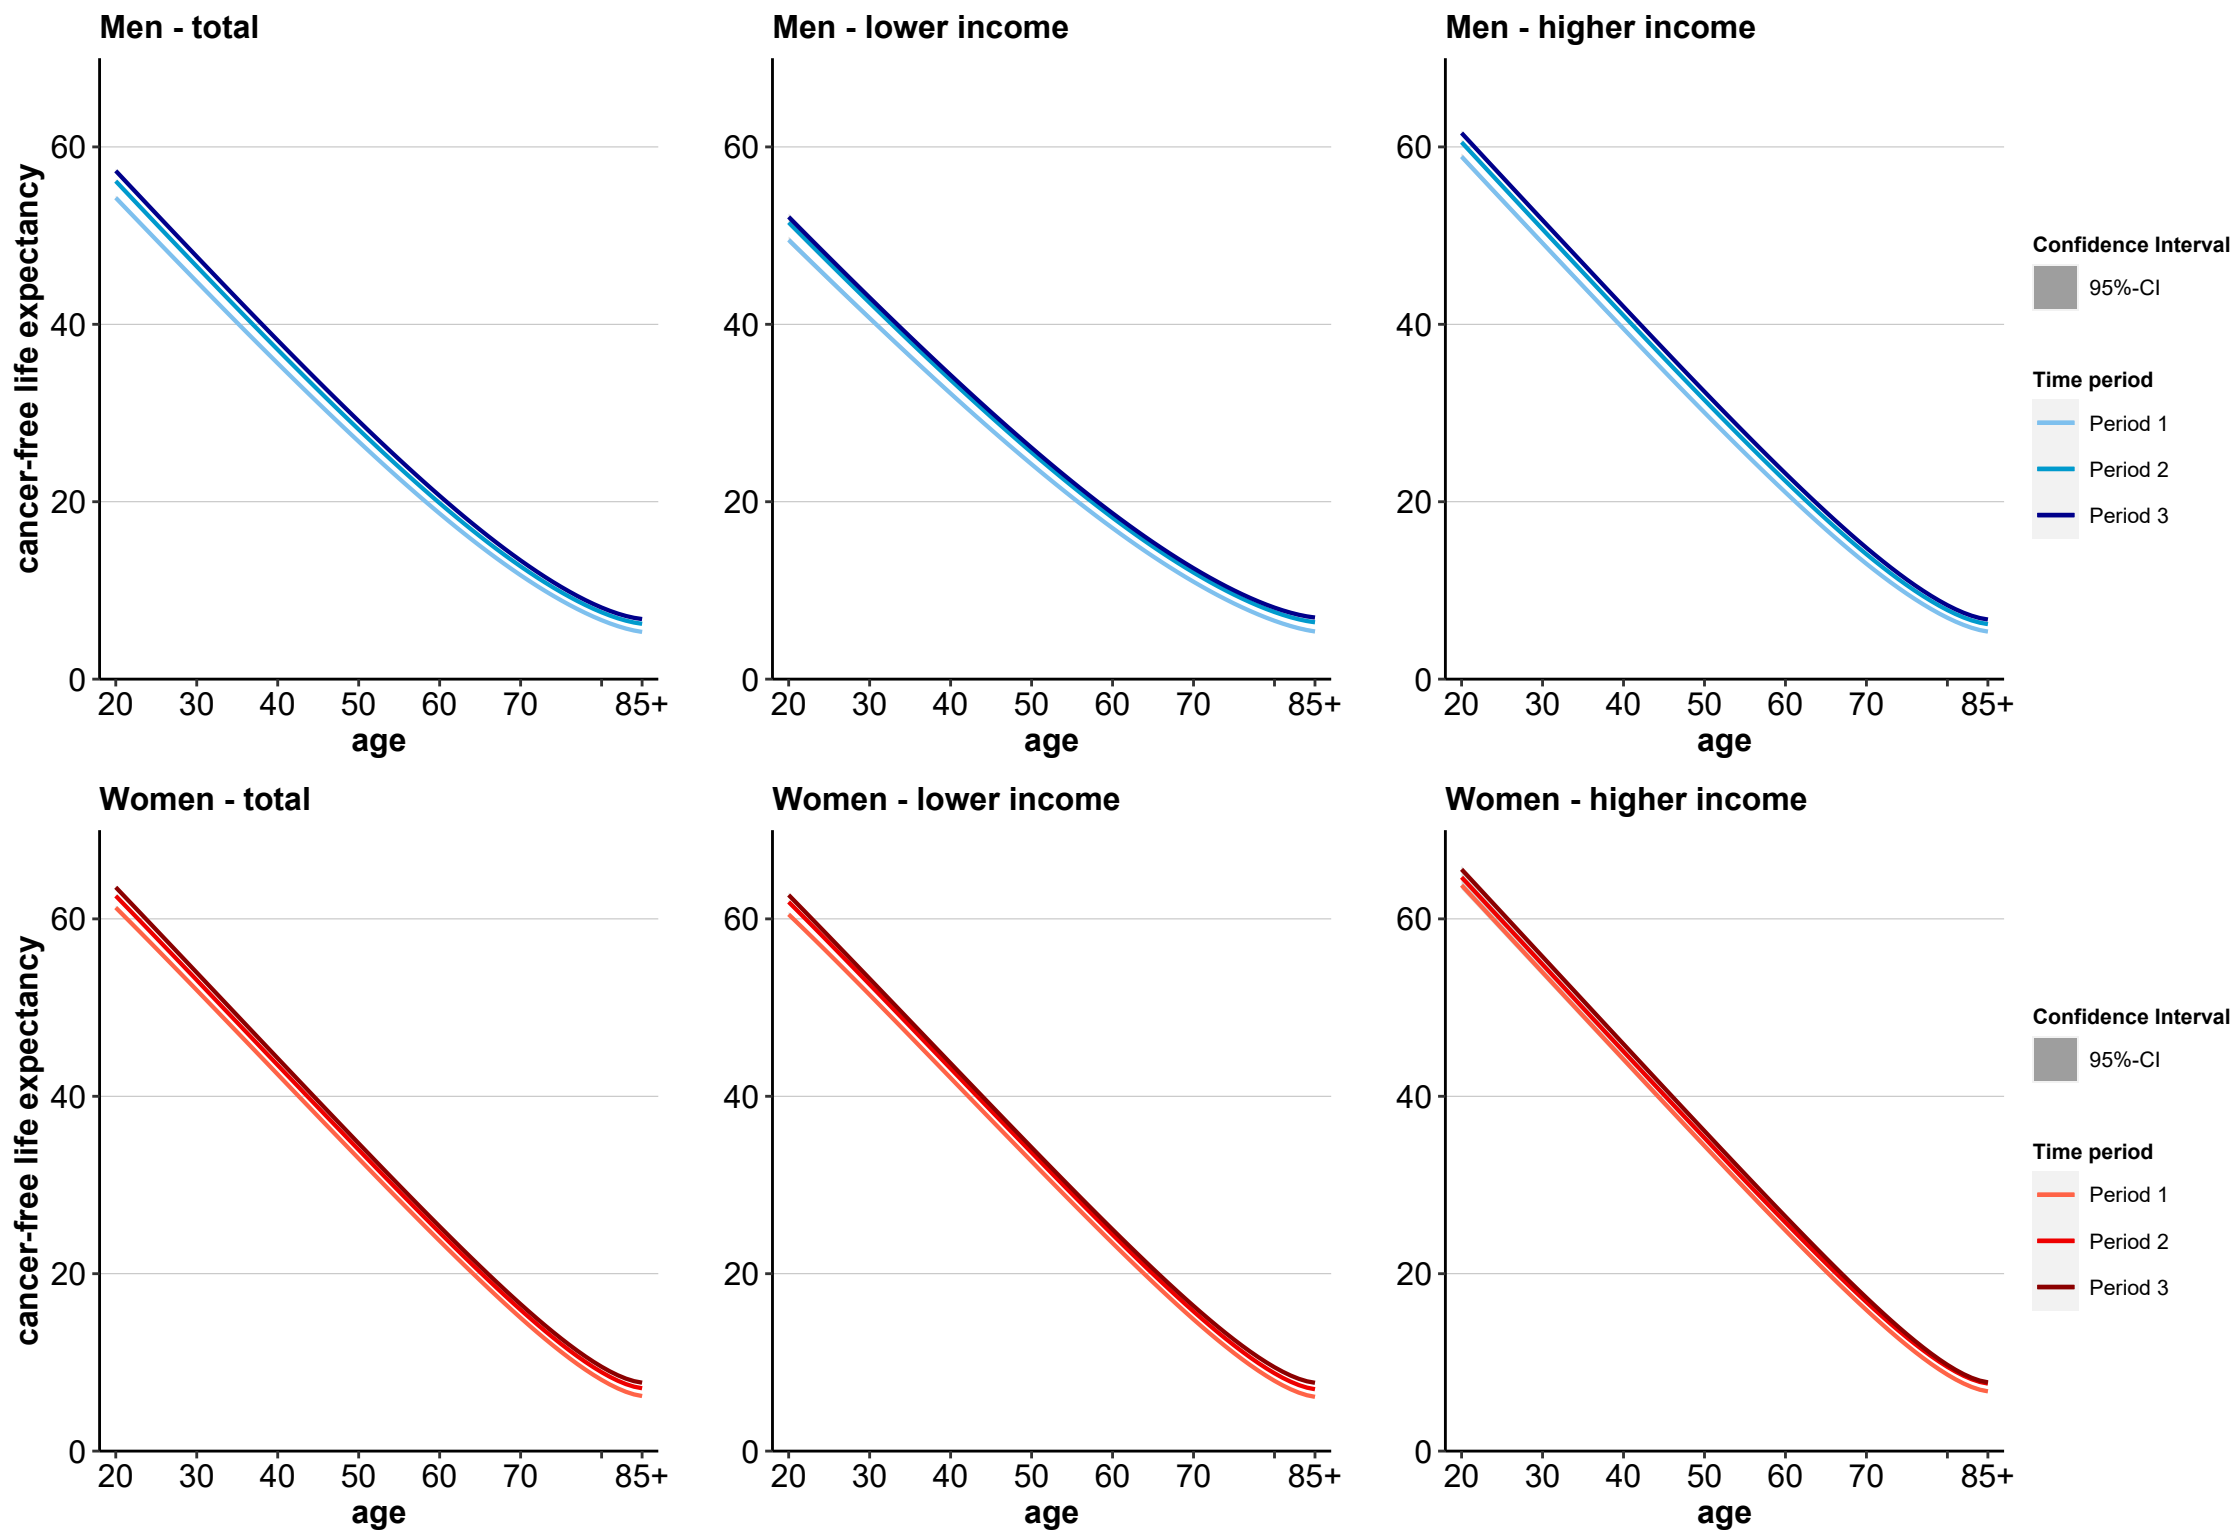

Fig. S13 Time trend in cancer-free life expectancy in skin cancer by sex and income group

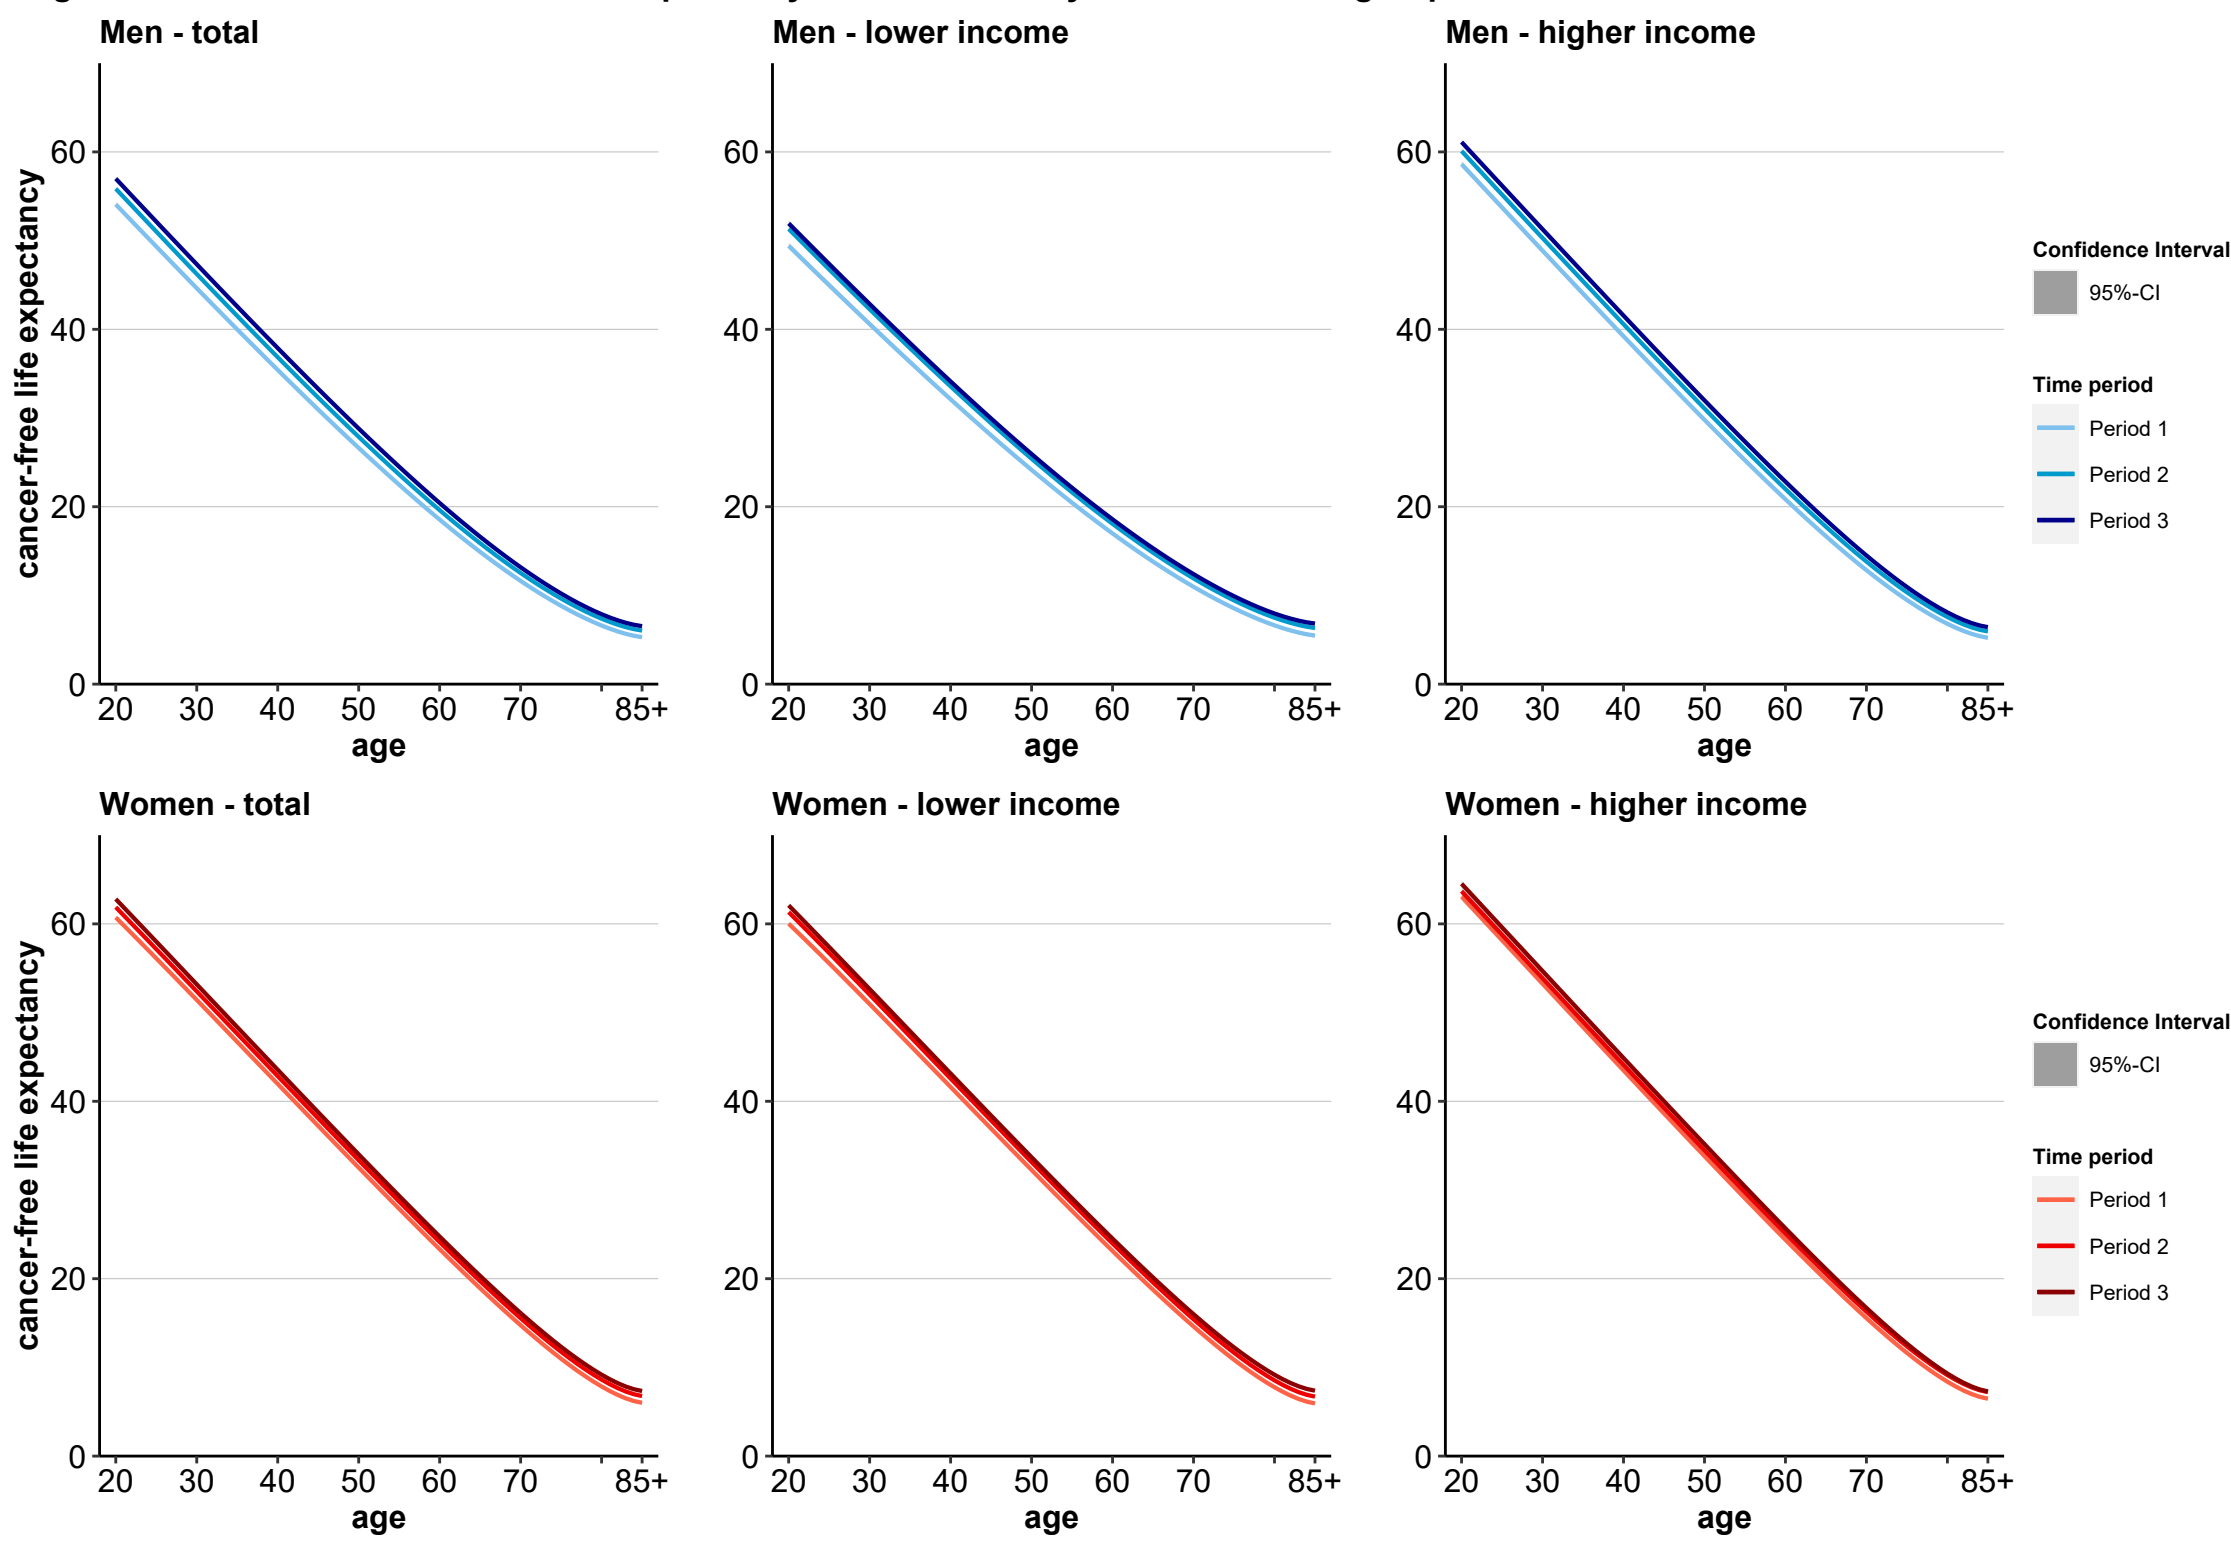

**Fig. S14 Time trend in cancer-free life expectancy in prostate, breast, and cervix cancer by sex and income group**

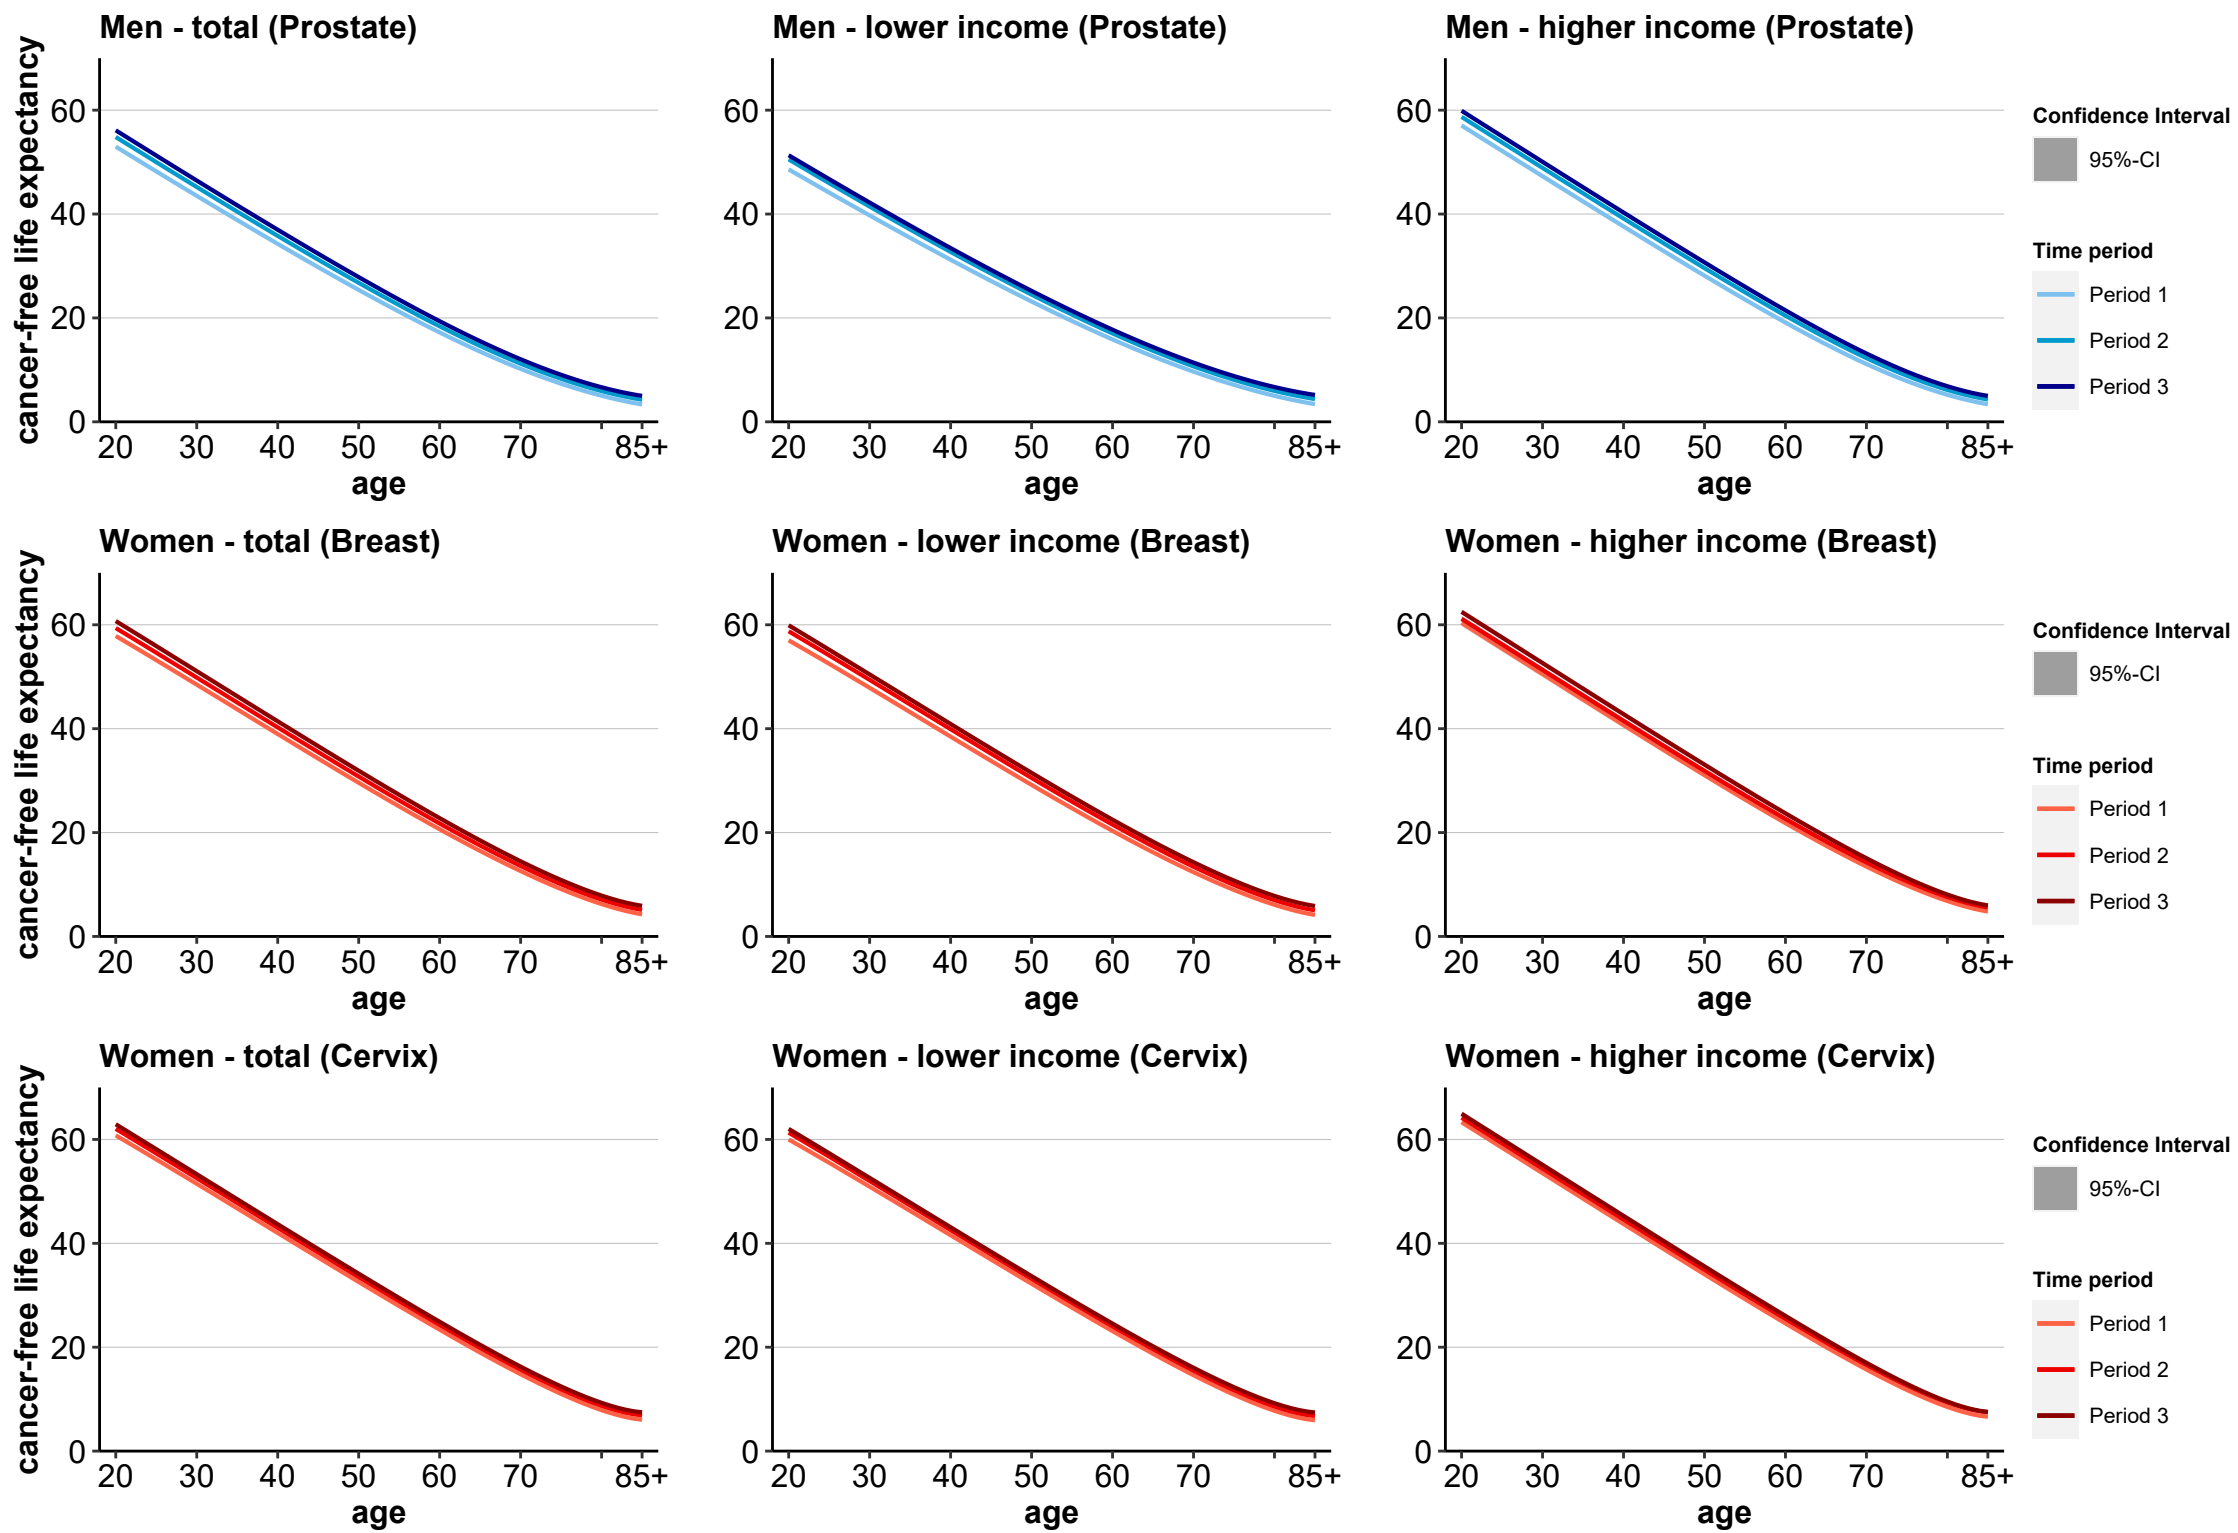

Fig. S15 Time trend in cancer-free life expectancy in other cancer by sex and income group

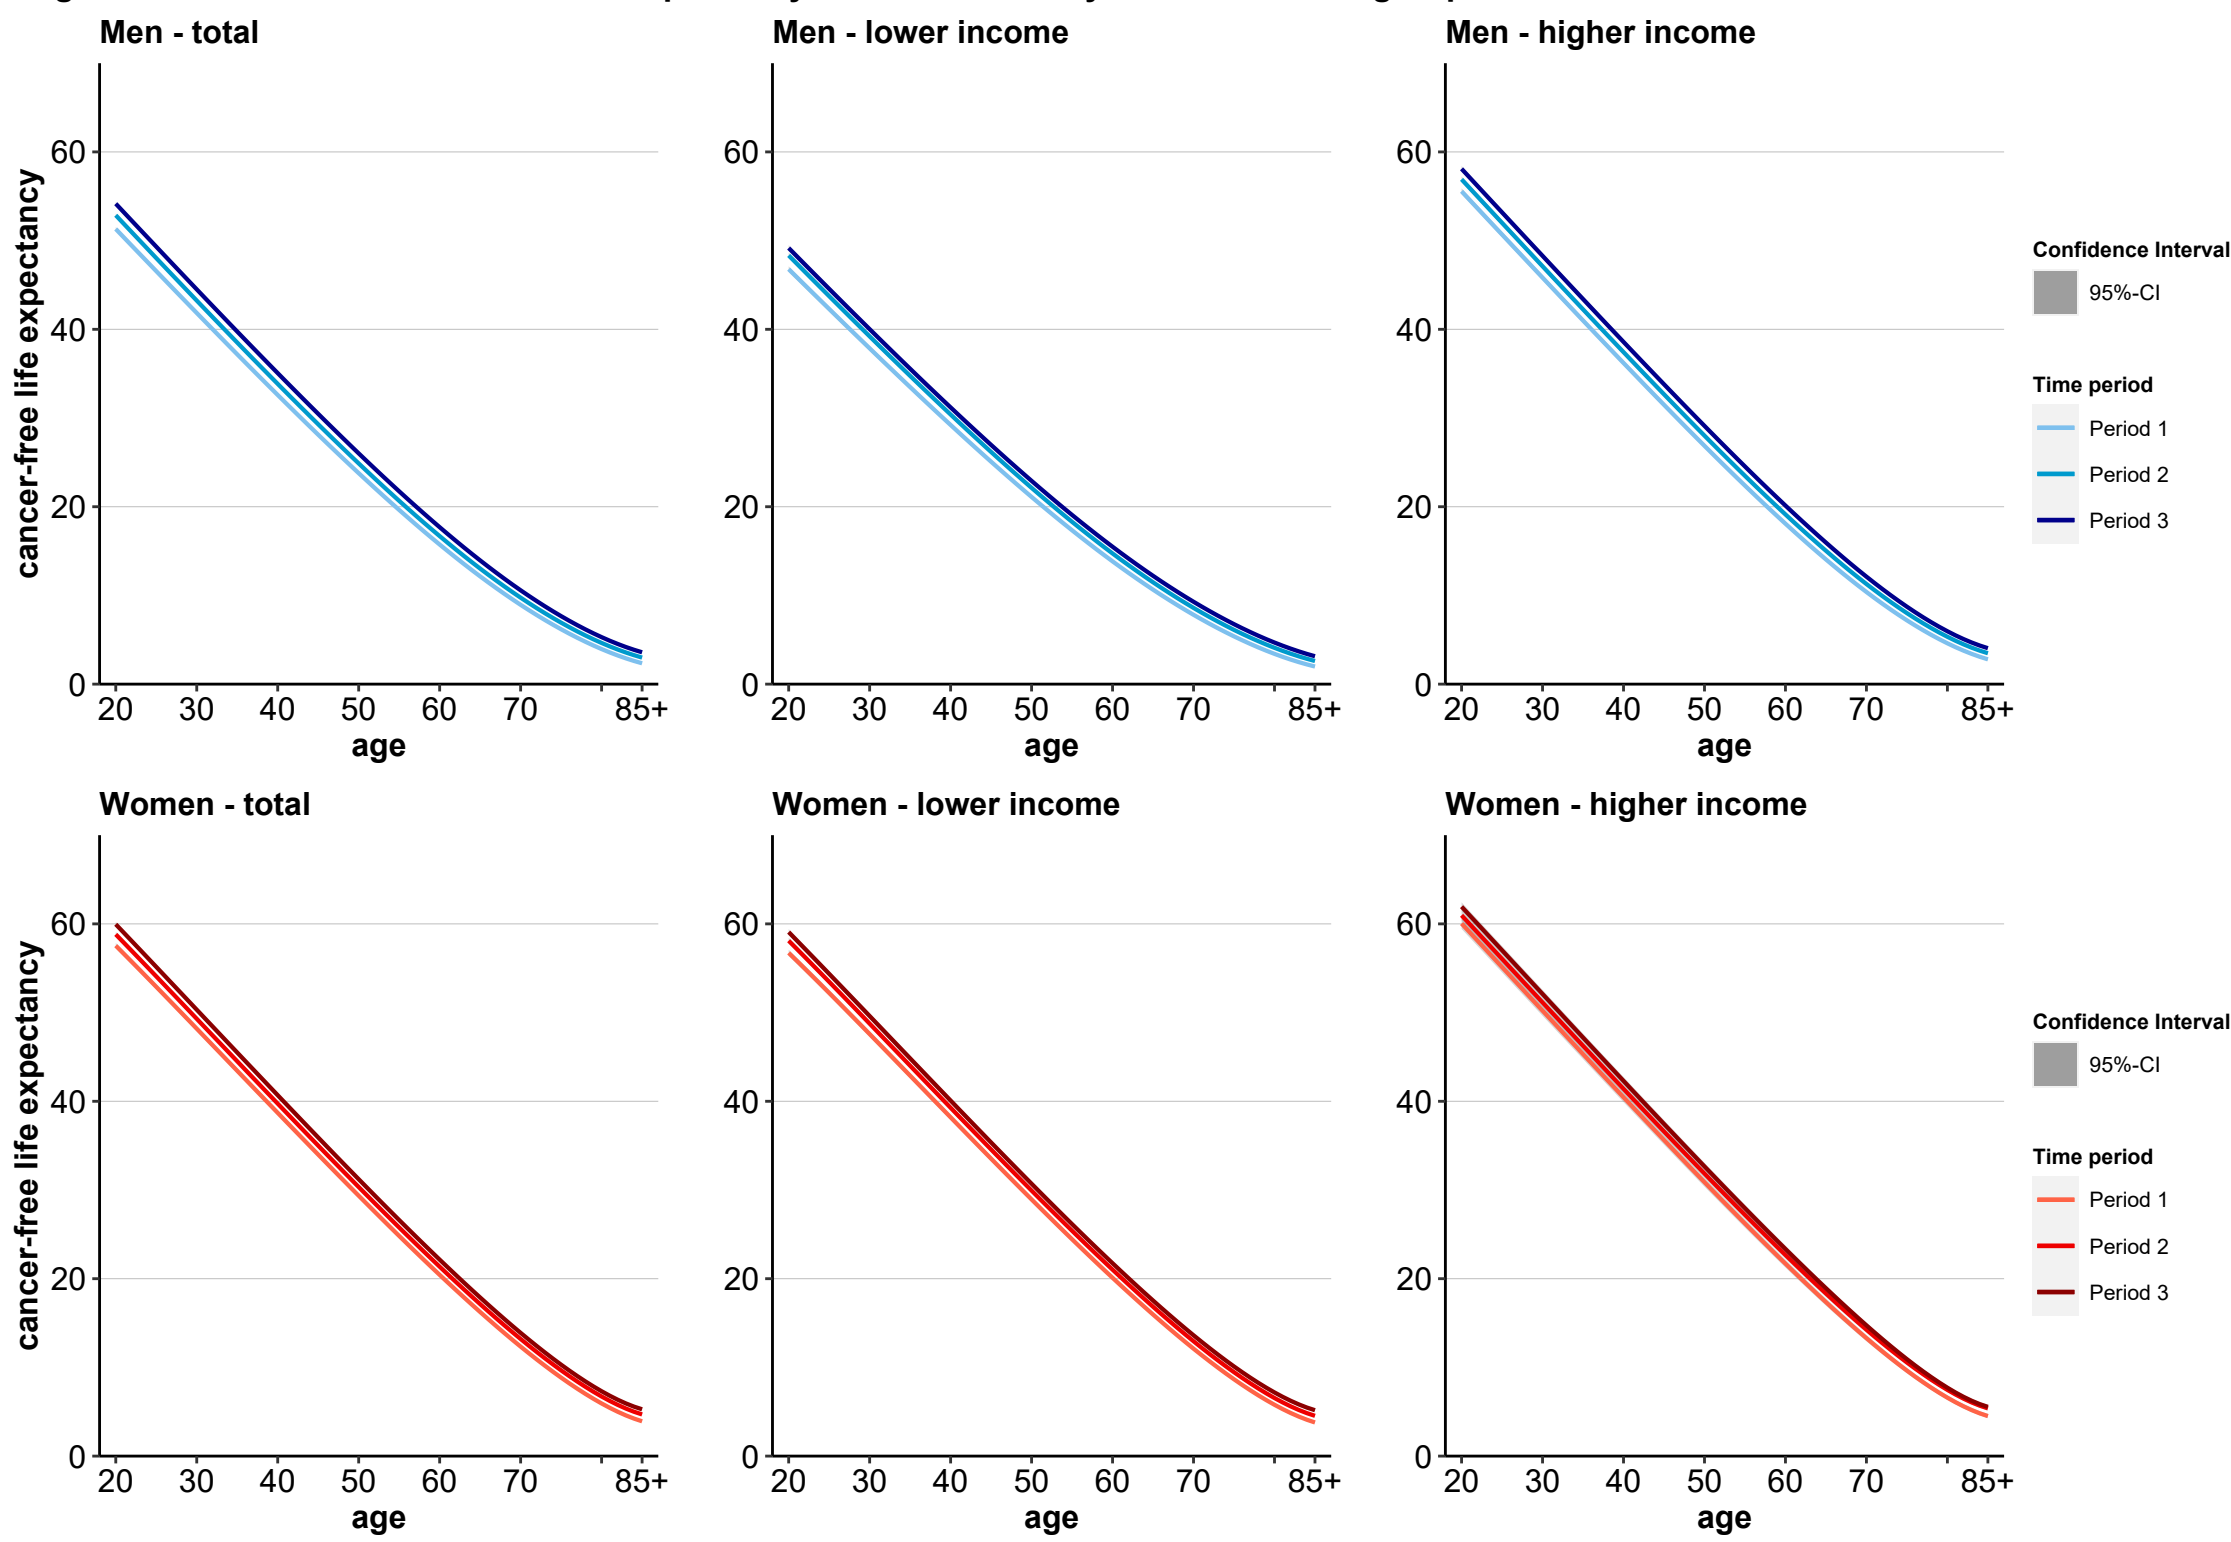

Supplement: DataSheet_1.pdf [file DataSheet_1.pdf]
